# Supplementary material for: Quantifying global soil carbon losses in response to warming
Source: Springer Nature journal article supplement (doi:10.1038/nature20150), 2016-11-29
Supplement: 41586_2016_BFnature20150_MOESM24_ESM.pdf [file 41586_2016_BFnature20150_MOESM24_ESM.pdf]

## Contents

|                                                                          |           |
|--------------------------------------------------------------------------|-----------|
| <b>LMER model selection</b>                                              | <b>2</b>  |
| <b>Linear regression models</b>                                          | <b>8</b>  |
| CI for parameter range . . . . .                                         | 8         |
| Global Extrapolations . . . . .                                          | 11        |
| <b>Figures</b>                                                           | <b>15</b> |
| Change in carbon per degree year with bootstrap (Figure 1) . . . . .     | 15        |
| Model-data plot for interactive statistical model (Figure 2a) . . . . .  | 17        |
| Boot strap slope comparison (Figure 2b) . . . . .                        | 19        |
| Global carbon vulnerability map (Figure 3a) . . . . .                    | 23        |
| Effect-time assumptions affects soil carbon losses (Figure 3b) . . . . . | 24        |
| <b>Data summary and basic visualizations</b>                             | <b>25</b> |
| <b>Helper functions</b>                                                  | <b>34</b> |
| Bootstrap function . . . . .                                             | 34        |
| Read data . . . . .                                                      | 34        |
| Construct study means and standard deviations . . . . .                  | 35        |
| Convert R data.frame to netCDF file . . . . .                            | 36        |
| Main analysis script . . . . .                                           | 38        |
| Extrapolation code . . . . .                                             | 43        |
| Global carbon loss map code . . . . .                                    | 50        |

## List of Tables

|   |                                                                                                                                                                                                                                                                                                                                                                            |   |
|---|----------------------------------------------------------------------------------------------------------------------------------------------------------------------------------------------------------------------------------------------------------------------------------------------------------------------------------------------------------------------------|---|
| 1 | Model fits comparing the statistical power gained by of treatment (degree-Years, and degree; additive.treat and additive.dT respectively) vs enviromental variables (MAT, MAP, and pH; additive.enviro) vs all variables include (additive.enviro) to explaining warmed soil carbon stocks. . . . .                                                                        | 7 |
| 2 | Model fits comparing the statistical power gained by multiplicative vs additive models using the controlled soil carbon stocks and degree-years or degrees warmed to explain warmed soil carbon stocks. The interactive degree-years model (interactive) significantly better then the alternative models (interactive.dT, additive.treat, and simple) considered. . . . . | 7 |

|   |                                                                                                                                                                                                                                                                                                                                                                                                                                                                                                                                                                                                                                                         |    |
|---|---------------------------------------------------------------------------------------------------------------------------------------------------------------------------------------------------------------------------------------------------------------------------------------------------------------------------------------------------------------------------------------------------------------------------------------------------------------------------------------------------------------------------------------------------------------------------------------------------------------------------------------------------------|----|
| 3 | R2 and p-value of the control soil carbon stock and degree-years or degrees to explain warmed soil carbon stocks, the difference between warmed and control soil carbon stocks, and the rate of change of soil carbon stocks per degree-year across samples and studies. . . . .                                                                                                                                                                                                                                                                                                                                                                        | 8  |
| 4 | 95%CI of the coefficients and R2 of the change in soil carbon stocks (warmed-controlled) per degree-year explained by the control soil carbon stock [kg-C m <sup>-3</sup> ], constructed from samples. The type key is as follows: dCperDegYr is the change in carbon stock regressed against the degree-year, dCperDeg is the change in carbon stock regressed against the degrees warmed, and the time notates a dC per degree-year regression where study times were capped at the stated time (ie for yr1 any study that ran longer then a year was set to one year and then the change in carbon stock agaist degree-year was calculated). . . . . | 9  |
| 5 | Global soil carbon change across effect-time assumptions. Type is analygous to the key described above. Global warming is the average global warming applied linearly over 35 years. Time step is the size of the time step used in the numerical integration. dC is the change in the soil carbon stock for the 5% quantile, 50% quantile, and 95% quantile respectively calcauted form the parameter ranges described above. . . . .                                                                                                                                                                                                                  | 11 |
| 6 | Description of study sites including mean annual temperature (MAT), mean annual precipitation (MAP), soil pH, and soil percent clay (perClay). For standardization purposes, all climate data were collected from Bioclim and all soil data were collected from SoilGrids, unless data was provided by study. . . . .                                                                                                                                                                                                                                                                                                                                   | 27 |
| 7 | Mean soil carbon [kg-C m <sup>-3</sup> ] values across control study site with number of samples in each study for the control plots. . . . .                                                                                                                                                                                                                                                                                                                                                                                                                                                                                                           | 29 |
| 8 | Mean soil carbon [kg-C m <sup>-3</sup> ] values across warmed study site with number of samples in each study for the warmed plots, their warming treatment [C], and length of treatment [years]. . . . .                                                                                                                                                                                                                                                                                                                                                                                                                                               | 30 |
| 9 | Biome of study sites. For standardization purposes, biome allocations were generated using the UNEP biomes map, unless data was provided by study. . . . .                                                                                                                                                                                                                                                                                                                                                                                                                                                                                              | 32 |

## LMER model selection

There were several LMER models which were considered as follows:

```
l_ply(names(lmer.list), function(xx){
  cat('-----',xx,'-----\n')
  print(summary(lmer.list[[xx]]))
  cat('\n')})

## ----- simple -----
## Linear mixed model fit by REML ['lmerMod']
## Formula: C.warmed ~ C.control + (1 | Study)
## Data: data.sample.plus.rescaled
##
## REML criterion at convergence: 298.6
##
## Scaled residuals:
##   Min       1Q   Median       3Q      Max
## -3.5710 -0.4376  0.0100  0.5099  3.3646
##
## Random effects:
## Groups   Name                Variance Std.Dev.
## Study    (Intercept)  0.004785  0.06917
```

```

## Residual          0.224720 0.47405
## Number of obs: 213, groups: Study, 47
##
## Fixed effects:
##           Estimate Std. Error t value
## (Intercept)  0.12979   0.04796   2.706
## C.control    0.86890   0.03401  25.548
##
## Correlation of Fixed Effects:
##           (Intr)
## C.control -0.701
##
## ----- addative.dT -----
## Linear mixed model fit by REML ['lmerMod']
## Formula: C.warmed ~ C.control + Tdelta + (1 | Study)
##   Data: data.sample.plus.rescaled
##
## REML criterion at convergence: 302.4
##
## Scaled residuals:
##   Min      1Q  Median      3Q      Max
## -3.5657 -0.4340  0.0158  0.5067  3.3363
##
## Random effects:
##   Groups   Name      Variance Std.Dev.
##   Study    (Intercept) 0.0008106 0.02847
##   Residual                0.2281379 0.47764
## Number of obs: 213, groups: Study, 47
##
## Fixed effects:
##           Estimate Std. Error t value
## (Intercept)  0.15543   0.05478   2.837
## C.control    0.88241   0.03342  26.406
## Tdelta      -0.03801   0.03348  -1.135
##
## Correlation of Fixed Effects:
##           (Intr) C.cntr
## C.control -0.519
## Tdelta   -0.523 -0.146
##
## ----- addative.all -----
## Linear mixed model fit by REML ['lmerMod']
## Formula: C.warmed ~ C.control + MAP + MAT + pH + degYr + perClay + (1 |
##   Study)
##   Data: data.sample.plus.rescaled
##
## REML criterion at convergence: 310.9
##
## Scaled residuals:
##   Min      1Q  Median      3Q      Max
## -3.3695 -0.5154  0.0043  0.4686  3.5373
##
## Random effects:
##   Groups   Name      Variance Std.Dev.

```

```

## Study (Intercept) 0.004465 0.06682
## Residual 0.219005 0.46798
## Number of obs: 213, groups: Study, 47
##
## Fixed effects:
## Estimate Std. Error t value
## (Intercept) 0.08816 0.07787 1.132
## C.control 0.83458 0.03868 21.576
## MAP 0.14869 0.06882 2.161
## MAT -0.16039 0.06317 -2.539
## pH 0.11411 0.05062 2.254
## degYr -0.06862 0.03717 -1.846
## perClay 0.04239 0.03852 1.100
##
## Correlation of Fixed Effects:
## (Intr) C.cntr MAP MAT pH degYr
## C.control -0.384
## MAP -0.247 -0.444
## MAT -0.004 0.456 -0.801
## pH -0.365 -0.261 0.693 -0.545
## degYr -0.143 0.040 -0.272 0.140 -0.399
## perClay -0.199 0.131 -0.177 -0.074 -0.269 0.063
##
## ----- additive.enviro -----
## Linear mixed model fit by REML ['lmerMod']
## Formula: C.warmed ~ C.control + MAP + MAT + pH + perClay + (1 | Study)
## Data: data.sample.plus.rescaled
##
## REML criterion at convergence: 309.4
##
## Scaled residuals:
## Min 1Q Median 3Q Max
## -3.3981 -0.4809 0.0177 0.5070 3.5172
##
## Random effects:
## Groups Name Variance Std.Dev.
## Study (Intercept) 0.01051 0.1025
## Residual 0.21674 0.4656
## Number of obs: 213, groups: Study, 47
##
## Fixed effects:
## Estimate Std. Error t value
## (Intercept) 0.07561 0.08078 0.936
## C.control 0.82323 0.04028 20.438
## MAP 0.12463 0.06944 1.795
## MAT -0.15238 0.06553 -2.325
## pH 0.08068 0.04869 1.657
## perClay 0.04554 0.04062 1.121
##
## Correlation of Fixed Effects:
## (Intr) C.cntr MAP MAT pH
## C.control -0.374
## MAP -0.305 -0.446
## MAT 0.019 0.449 -0.798

```

```

## pH          -0.466 -0.267  0.661 -0.537
## perClay    -0.197  0.131 -0.168 -0.083 -0.265
##
## ----- additive.treat -----
## Linear mixed model fit by REML ['lmerMod']
## Formula: C.warmed ~ C.control + degYr + (1 | Study)
##   Data: data.sample.plus.rescaled
##
## REML criterion at convergence: 302.3
##
## Scaled residuals:
##   Min       1Q   Median       3Q      Max
## -3.5364 -0.4377 -0.0072  0.4943  3.3422
##
## Random effects:
##   Groups   Name                Variance Std.Dev.
##   Study    (Intercept)  0.00174  0.04171
##   Residual                    0.22723  0.47669
## Number of obs: 213, groups: Study, 47
##
## Fixed effects:
##              Estimate Std. Error t value
## (Intercept)  0.16115    0.05703   2.826
## C.control    0.87610    0.03330  26.313
## degYr        -0.03774   0.03330  -1.133
##
## Correlation of Fixed Effects:
##              (Intr) C.cntr
## C.control   -0.564
## degYr       -0.567 -0.030
##
## ----- interactive -----
## Linear mixed model fit by REML ['lmerMod']
## Formula: C.warmed ~ C.control * degYr + (1 | Study)
##   Data: data.sample.plus.rescaled
##
## REML criterion at convergence: 301.6
##
## Scaled residuals:
##   Min       1Q   Median       3Q      Max
## -3.5792 -0.4282 -0.0107  0.4858  3.3985
##
## Random effects:
##   Groups   Name                Variance Std.Dev.
##   Study    (Intercept)  0.006856  0.0828
##   Residual                    0.217700  0.4666
## Number of obs: 213, groups: Study, 47
##
## Fixed effects:
##              Estimate Std. Error t value
## (Intercept)  0.10596    0.06369   1.664
## C.control    0.94370    0.04690  20.120
## degYr        0.03422    0.04482   0.763
## C.control:degYr -0.08237   0.03407  -2.418

```

```

##
## Correlation of Fixed Effects:
##           (Intr) C.cntr degYr
## C.control  -0.645
## degYr      -0.655  0.421
## C.cntrl:dgY 0.404 -0.686 -0.646
##
## ----- interactive.dT -----
## Linear mixed model fit by REML ['lmerMod']
## Formula: C.warmed ~ C.control * Tdelta + (1 | Study)
## Data: data.sample.plus.rescaled
##
## REML criterion at convergence: 304.3
##
## Scaled residuals:
##      Min       1Q   Median       3Q      Max
## -3.7097 -0.4567  0.0184  0.4999  3.3500
##
## Random effects:
## Groups Name Variance Std.Dev.
## Study (Intercept) 0.001885 0.04342
## Residual 0.224830 0.47416
## Number of obs: 213, groups: Study, 47
##
## Fixed effects:
##              Estimate Std. Error t value
## (Intercept)  0.08639   0.06785   1.273
## C.control    0.93133   0.04422  21.063
## Tdelta       0.04506   0.05736   0.785
## C.control:Tdelta -0.05523  0.03109  -1.776
##
## Correlation of Fixed Effects:
##           (Intr) C.cntr Tdelta
## C.control  -0.699
## Tdelta     -0.724  0.463
## C.cntrl:Tdl 0.585 -0.652 -0.810

```

Comparing the BIC scores between the models, the simple regression between the carbon stock in the warmed plots and the mean carbon stock of the control plots has the best score. The model with the additive degree-years or degrees preforms best if we want more then just the basic correlation. There is no notable difference between degree-years and degrees as a determinant for warmed soil carbon stocks.

```

pander(anova(lmer.list$simple, lmer.list$addative.treat,
            lmer.list$addative.dT, lmer.list$addative.enviro,
            lmer.list$addative.all), caption='Model fits comparing the statistical power
            gained by of treatment (degree-Years, and degree; addative.treat and
            addative.dT respectively) vs enviromental variables (MAT, MAP, and pH;
            addative.enviro) vs all variables include (addative.enviro) to
            explaining warmed soil carbon stocks.')

```

```

## refitting model(s) with ML (instead of REML)

```

Table 1: Model fits comparing the statistical power gained by of treatment (degree-Years, and degree; additive.treat and additive.dT respectively) vs environmental variables (MAT, MAP, and pH; additive.enviro) vs all variables include (additive.enviro) to explaining warmed soil carbon stocks.

|                                   | Df | AIC   | BIC   | logLik | deviance | Chisq | Chi Df | Pr(>Chisq) |
|-----------------------------------|----|-------|-------|--------|----------|-------|--------|------------|
| <b>lmer.list\$simple</b>          | 4  | 296.7 | 310.2 | -144.4 | 288.7    | NA    | NA     | NA         |
| <b>lmer.list\$additive.treat</b>  | 5  | 297.4 | 314.2 | -143.7 | 287.4    | 1.368 | 1      | 0.2422     |
| <b>lmer.list\$additive.dT</b>     | 5  | 297.4 | 314.2 | -143.7 | 287.4    | 0     | 0      | 1          |
| <b>lmer.list\$additive.enviro</b> | 8  | 297.3 | 324.2 | -140.7 | 281.3    | 6.048 | 3      | 0.1093     |
| <b>lmer.list\$additive.all</b>    | 9  | 295.6 | 325.8 | -138.8 | 277.6    | 3.785 | 1      | 0.0517     |

The interactive model has both a better AIC and BIC score than even the simple regression. Thus the interactive model is the most parsimonious.

```
pander(anova(lmer.list$interactive, lmer.list$interactive.dT, lmer.list$additive.treat,
             lmer.list$simple),
       caption='Model fits comparing the statistical power gained by multiplicative
vs additive models using the controlled soil carbon stocks and degree-years or degrees
warmed to explain warmed soil carbon stocks. The interactive degree-years model
(interactive) significantly better than the alternative models
(interactive.dT, additive.treat, and simple) considered.')
```

```
## refitting model(s) with ML (instead of REML)
```

Table 2: Model fits comparing the statistical power gained by multiplicative vs additive models using the controlled soil carbon stocks and degree-years or degrees warmed to explain warmed soil carbon stocks. The interactive degree-years model (interactive) significantly better than the alternative models (interactive.dT, additive.treat, and simple) considered.

|                                  | Df | AIC   | BIC   | logLik | deviance | Chisq | Chi Df | Pr(>Chisq) |
|----------------------------------|----|-------|-------|--------|----------|-------|--------|------------|
| <b>lmer.list\$simple</b>         | 4  | 296.7 | 310.2 | -144.4 | 288.7    | NA    | NA     | NA         |
| <b>lmer.list\$additive.treat</b> | 5  | 297.4 | 314.2 | -143.7 | 287.4    | 1.368 | 1      | 0.2422     |
| <b>lmer.list\$interactive</b>    | 6  | 293.7 | 313.9 | -140.8 | 281.7    | 5.665 | 1      | 0.01731    |
| <b>lmer.list\$interactive.dT</b> | 6  | 296.2 | 316.3 | -142.1 | 284.2    | 0     | 0      | 1          |

## Linear regression models

```
pander(merge(subset(modelFits, data=='data.sample', select=-data),
             subset(modelFits, data=='data.study', select=-data),
             by=c('model'), suffixes=c('.sample', '.study'))[,c('model', 'adjR2.sample', 'pvalue.sample',
             caption='R2 and p-value of the control soil carbon stock and degree-years or degrees to
             explain warmed soil carbon stocks, the difference between warmed and control soil carbon
             stocks, and the rate of change of soil carbon stocks per degree-year across samples and
             studies.')
```

Table 3: R2 and p-value of the control soil carbon stock and degree-years or degrees to explain warmed soil carbon stocks, the difference between warmed and control soil carbon stocks, and the rate of change of soil carbon stocks per degree-year across samples and studies.

| model                                               | adjR2.sample | pvalue.sample | adjR2.study | pvalue.study |
|-----------------------------------------------------|--------------|---------------|-------------|--------------|
| (C.warmed - C.control)/(Years * Tdelta) ~ C.control | 0.151        | 2.09e-09      | 0.489       | 1.4e-08      |
| (C.warmed - C.control)/Tdelta ~ C.control           | 0.145        | 4.52e-09      | 0.304       | 2.37e-05     |
| C.warmed - C.control ~ C.control * degYr            | 0.442        | 3.13e-27      | 0.606       | 8.22e-10     |
| C.warmed - C.control ~ C.control * Tdelta           | 0.411        | 8.82e-25      | 0.529       | 4.32e-08     |
| C.warmed ~ C.control * degYr                        | 0.815        | 9.59e-78      | 0.953       | 1.36e-30     |
| C.warmed ~ C.control * Tdelta                       | 0.805        | 2.78e-75      | 0.944       | 7.51e-29     |

## CI for parameter range

```
ggplot(melt(dCperDegYr.boot)) +
  geom_histogram(aes(x=value)) + facet_wrap(~variable, scales='free') +
  theme(axis.text=element_text(angle = 45, hjust = 1))
```

```
## No id variables; using all as measure variables
## `stat_bin()` using `bins = 30`. Pick better value with `binwidth`.
```



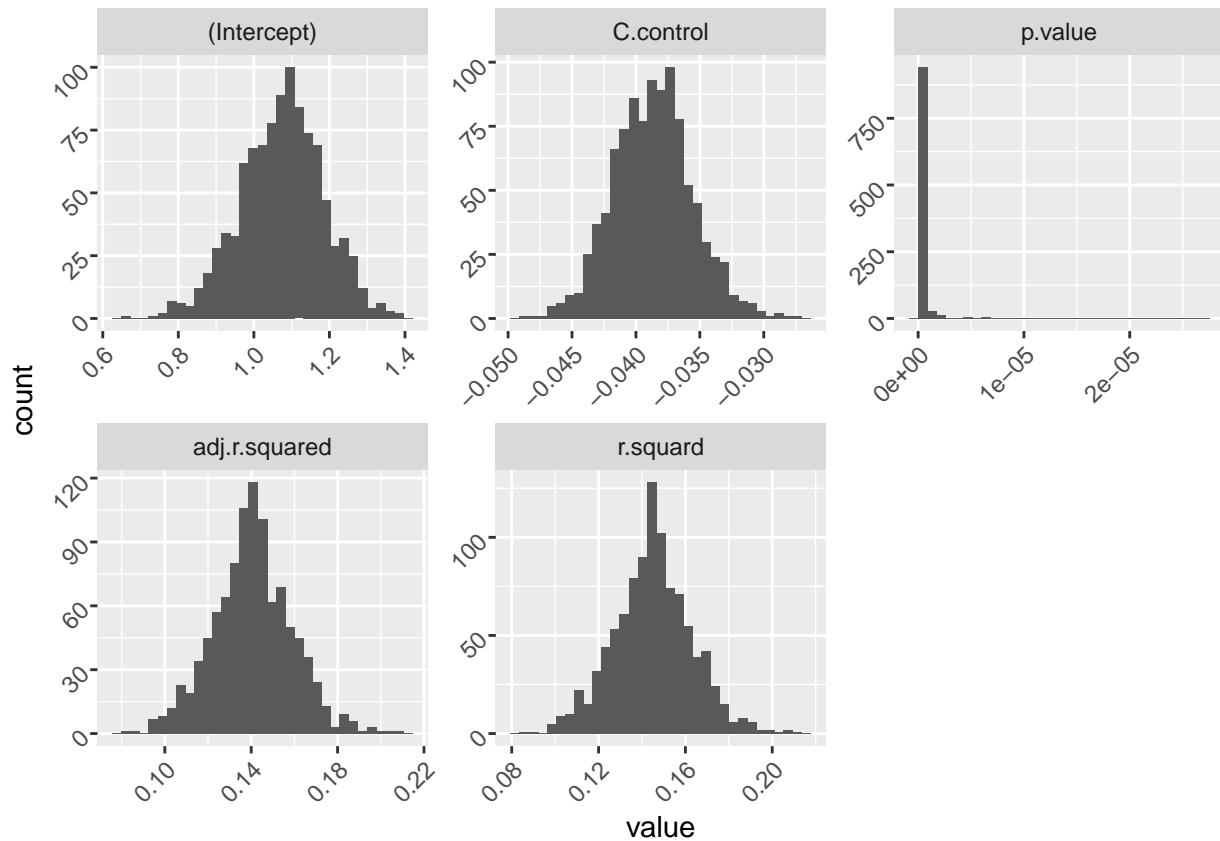

```
pander(subset(parRange, type %in% resultsTable$type), caption='95%CI of the coefficients and R2 of the change in soil carbon stocks (warmed-controlled) per degree-year explained by the control soil carbon stock [kg-C m-3], constructed from samples. The type key is as follows: dCperDegYr is the change in carbon stock regressed against the degree-year, dCperDeg is the change in carbon stock regressed against the degrees warmed, and the time notates a dC per degree-year regression where study times were capped at the stated time (ie for yr1 any study that ran longer then a year was set to one year and then the change in carbon stock against degree-year was calculated).')
```

Table 4: 95%CI of the coefficients and R2 of the change in soil carbon stocks (warmed-controlled) per degree-year explained by the control soil carbon stock [kg-C m<sup>-3</sup>], constructed from samples. The type key is as follows: dCperDegYr is the change in carbon stock regressed against the degree-year, dCperDeg is the change in carbon stock regressed against the degrees warmed, and the time notates a dC per degree-year regression where study times were capped at the stated time (ie for yr1 any study that ran longer then a year was set to one year and then the change in carbon stock against degree-year was calculated).

|   | type       | intercept | C        | p.value   | adj.r.squared | r.squared | qrt  |
|---|------------|-----------|----------|-----------|---------------|-----------|------|
| 1 | dCperDegYr | 0.8866    | -0.04358 | 9.34e-10  | 0.1089        | 0.1134    | 0.05 |
| 2 | dCperDegYr | 1.076     | -0.03864 | 3.083e-08 | 0.1407        | 0.145     | 0.5  |

|           | type       | intercept | C        | p.value   | adj.r.squared | r.squared | qrt  |
|-----------|------------|-----------|----------|-----------|---------------|-----------|------|
| <b>3</b>  | dCperDegYr | 1.254     | -0.03334 | 1.188e-06 | 0.1701        | 0.1743    | 0.95 |
| <b>4</b>  | dCperDeg   | 4.001     | -0.2091  | 2.298e-09 | 0.09723       | 0.1018    | 0.05 |
| <b>5</b>  | dCperDeg   | 5.399     | -0.1855  | 9.812e-08 | 0.1308        | 0.1352    | 0.5  |
| <b>6</b>  | dCperDeg   | 6.223     | -0.1319  | 4.448e-06 | 0.1627        | 0.1669    | 0.95 |
| <b>7</b>  | wk1        | 198.6     | -10.94   | 2.241e-09 | 0.09451       | 0.09911   | 0.05 |
| <b>8</b>  | wk1        | 280.4     | -9.688   | 1.216e-07 | 0.129         | 0.1334    | 0.5  |
| <b>9</b>  | wk1        | 323.8     | -6.559   | 6.267e-06 | 0.1626        | 0.1668    | 0.95 |
| <b>10</b> | mon1       | 46.13     | -2.52    | 1.473e-09 | 0.09606       | 0.1006    | 0.05 |
| <b>11</b> | mon1       | 64.59     | -2.237   | 1.03e-07  | 0.1304        | 0.1348    | 0.5  |
| <b>12</b> | mon1       | 74.9      | -1.515   | 5.263e-06 | 0.1664        | 0.1706    | 0.95 |
| <b>13</b> | mon6       | 7.253     | -0.416   | 1.98e-09  | 0.08499       | 0.08964   | 0.05 |
| <b>14</b> | mon6       | 10.72     | -0.3699  | 1.025e-07 | 0.1303        | 0.1347    | 0.5  |
| <b>15</b> | mon6       | 12.34     | -0.2427  | 1.829e-05 | 0.1633        | 0.1675    | 0.95 |
| <b>16</b> | yr1        | 3.901     | -0.2117  | 1.483e-09 | 0.09832       | 0.1029    | 0.05 |
| <b>17</b> | yr1        | 5.5       | -0.1893  | 7.171e-08 | 0.1335        | 0.1379    | 0.5  |
| <b>18</b> | yr1        | 6.268     | -0.1288  | 4.002e-06 | 0.1659        | 0.1701    | 0.95 |
| <b>22</b> | yr5        | 1.16      | -0.0577  | 2.853e-10 | 0.1218        | 0.1262    | 0.05 |
| <b>23</b> | yr5        | 1.451     | -0.05142 | 9.718e-09 | 0.1503        | 0.1546    | 0.5  |
| <b>24</b> | yr5        | 1.688     | -0.04257 | 2.814e-07 | 0.1799        | 0.1841    | 0.95 |
| <b>25</b> | yr7        | 1.033     | -0.05116 | 1.995e-10 | 0.1197        | 0.1241    | 0.05 |
| <b>26</b> | yr7        | 1.264     | -0.0455  | 5.731e-09 | 0.155         | 0.1593    | 0.5  |
| <b>27</b> | yr7        | 1.474     | -0.03836 | 3.57e-07  | 0.1823        | 0.1864    | 0.95 |
| <b>31</b> | yr8.75     | 0.9666    | -0.04752 | 2.73e-10  | 0.1166        | 0.1211    | 0.05 |
| <b>32</b> | yr8.75     | 1.169     | -0.04227 | 8.245e-09 | 0.1518        | 0.1561    | 0.5  |
| <b>33</b> | yr8.75     | 1.348     | -0.03643 | 4.96e-07  | 0.1803        | 0.1844    | 0.95 |
| <b>37</b> | yr11.6     | 0.9024    | -0.04494 | 5.163e-10 | 0.1146        | 0.1191    | 0.05 |
| <b>38</b> | yr11.6     | 1.096     | -0.03992 | 1.592e-08 | 0.1463        | 0.1506    | 0.5  |

|           | type   | intercept | C        | p.value   | adj.r.squared | r.squared | qrt  |
|-----------|--------|-----------|----------|-----------|---------------|-----------|------|
| <b>39</b> | yr11.6 | 1.281     | -0.03461 | 6.246e-07 | 0.175         | 0.1792    | 0.95 |
| <b>43</b> | yr17.5 | 0.8823    | -0.04337 | 9.387e-10 | 0.1086        | 0.1132    | 0.05 |
| <b>44</b> | yr17.5 | 1.067     | -0.03851 | 3.577e-08 | 0.1394        | 0.1438    | 0.5  |
| <b>45</b> | yr17.5 | 1.246     | -0.03345 | 1.263e-06 | 0.1701        | 0.1743    | 0.95 |
| <b>55</b> | yr35   | 0.8928    | -0.04337 | 9.072e-10 | 0.1112        | 0.1158    | 0.05 |
| <b>56</b> | yr35   | 1.071     | -0.03878 | 3.3e-08   | 0.14          | 0.1444    | 0.5  |
| <b>57</b> | yr35   | 1.243     | -0.03366 | 9.32e-07  | 0.1702        | 0.1744    | 0.95 |

## Global Extrapolations

```
temp <- subset(resultsTable, globalWarming %in% c(1,2), c('type', 'globalWarming', 'warmingDistribution'))
row.names(temp) <- NULL
pander(temp,
  caption='Global soil carbon change across effect-time assumptions. Type is analogous to the key described above. Global warming is the average global warming applied linearly over 35 years. Time step is the size of the time step used in the numerical integration. dC is the change in the soil carbon stock for the 5% quantile, 50% quantile, and 95% quantile respectively calculated from the parameter ranges described above.',
  round=c(1,1,1,3,0,0,0))
```

Table 5: Global soil carbon change across effect-time assumptions. Type is analogous to the key described above. Global warming is the average global warming applied linearly over 35 years. Time step is the size of the time step used in the numerical integration. dC is the change in the soil carbon stock for the 5% quantile, 50% quantile, and 95% quantile respectively calculated from the parameter ranges described above.

| type       | globalWarming | warmingDistribution | timeStep | dC_qrt05 | dC_qrt50 | dC_qrt95 |
|------------|---------------|---------------------|----------|----------|----------|----------|
| dCperDeg   | 1             | unif                | NA       | -103     | -55      | 9        |
| dCperDegYr | 1             | unif                | 0.019    | 0        | 0        | 0        |
| dCperDegYr | 1             | unif                | 0.083    | 0        | 0        | 0        |
| dCperDegYr | 1             | unif                | 0.5      | 0        | 0        | 0        |
| dCperDegYr | 1             | unif                | 1        | 0        | 0        | 0        |
| dCperDegYr | 1             | unif                | 10       | -29      | -18      | -6       |
| dCperDegYr | 1             | unif                | 11.67    | -40      | -24      | -8       |

| type       | globalWarming | warmingDistribution | timeStep | dC_qrt05 | dC_qrt50 | dC_qrt95 |
|------------|---------------|---------------------|----------|----------|----------|----------|
| dCperDegYr | 1             | unif                | 17.5     | -89      | -54      | -18      |
| dCperDegYr | 1             | unif                | 20       | -117     | -70      | -24      |
| dCperDegYr | 1             | unif                | 25       | -183     | -110     | -37      |
| dCperDegYr | 1             | unif                | 30       | -263     | -158     | -53      |
| dCperDegYr | 1             | unif                | 35       | -358     | -216     | -72      |
| dCperDegYr | 1             | unif                | 4        | -5       | -3       | -1       |
| dCperDegYr | 1             | unif                | 5        | -7       | -4       | -1       |
| dCperDegYr | 1             | unif                | 7        | -14      | -9       | -3       |
| dCperDegYr | 1             | unif                | 8        | -19      | -11      | -4       |
| dCperDegYr | 1             | unif                | 8.75     | -22      | -13      | -5       |
| mon1       | 1             | unif                | 0.083    | -50      | -26      | 7        |
| mon6       | 1             | unif                | 0.5      | -51      | -26      | 8        |
| wk1        | 1             | unif                | 0.019    | -50      | -26      | 7        |
| yr1        | 1             | unif                | 1        | -51      | -27      | 6        |
| yr11.6     | 1             | unif                | 11.67    | -114     | -70      | -26      |
| yr17.5     | 1             | unif                | 17.5     | -161     | -99      | -36      |
| yr35       | 1             | unif                | 35       | -352     | -219     | -81      |
| yr5        | 1             | unif                | 5        | -64      | -38      | -8       |
| yr7        | 1             | unif                | 7        | -79      | -48      | -14      |
| yr8.75     | 1             | unif                | 8.75     | -90      | -56      | -20      |
| dCperDeg   | 1             | CESM                | NA       | -103     | -55      | 9        |
| dCperDegYr | 1             | CESM                | 0.019    | 0        | 0        | 0        |
| dCperDegYr | 1             | CESM                | 0.083    | 0        | 0        | 0        |
| dCperDegYr | 1             | CESM                | 0.5      | 0        | 0        | 0        |
| dCperDegYr | 1             | CESM                | 1        | 0        | 0        | 0        |
| dCperDegYr | 1             | CESM                | 10       | -29      | -18      | -6       |
| dCperDegYr | 1             | CESM                | 11.67    | -40      | -24      | -8       |
| dCperDegYr | 1             | CESM                | 17.5     | -89      | -54      | -18      |
| dCperDegYr | 1             | CESM                | 20       | -116     | -70      | -24      |
| dCperDegYr | 1             | CESM                | 25       | -177     | -107     | -35      |
| dCperDegYr | 1             | CESM                | 30       | -249     | -149     | -48      |

| type       | globalWarming | warmingDistribution | timeStep | dC_qrt05 | dC_qrt50 | dC_qrt95 |
|------------|---------------|---------------------|----------|----------|----------|----------|
| dCperDegYr | 1             | CESM                | 35       | -326     | -195     | -60      |
| dCperDegYr | 1             | CESM                | 4        | -5       | -3       | -1       |
| dCperDegYr | 1             | CESM                | 5        | -7       | -4       | -2       |
| dCperDegYr | 1             | CESM                | 7        | -14      | -9       | -3       |
| dCperDegYr | 1             | CESM                | 8        | -19      | -11      | -4       |
| dCperDegYr | 1             | CESM                | 8.75     | -22      | -14      | -5       |
| mon1       | 1             | CESM                | 0.083    | -49      | -25      | 7        |
| mon6       | 1             | CESM                | 0.5      | -51      | -25      | 8        |
| wk1        | 1             | CESM                | 0.019    | -49      | -25      | 7        |
| yr1        | 1             | CESM                | 1        | -50      | -26      | 6        |
| yr11.6     | 1             | CESM                | 11.67    | -110     | -68      | -24      |
| yr17.5     | 1             | CESM                | 17.5     | -153     | -94      | -33      |
| yr35       | 1             | CESM                | 35       | -321     | -199     | -68      |
| yr5        | 1             | CESM                | 5        | -63      | -37      | -8       |
| yr7        | 1             | CESM                | 7        | -77      | -46      | -13      |
| yr8.75     | 1             | CESM                | 8.75     | -88      | -54      | -19      |
| dCperDeg   | 2             | unif                | NA       | -206     | -109     | 18       |
| dCperDegYr | 2             | unif                | 0.019    | 0        | 0        | 0        |
| dCperDegYr | 2             | unif                | 0.083    | 0        | 0        | 0        |
| dCperDegYr | 2             | unif                | 0.5      | 0        | 0        | 0        |
| dCperDegYr | 2             | unif                | 1        | -1       | 0        | 0        |
| dCperDegYr | 2             | unif                | 10       | -58      | -35      | -12      |
| dCperDegYr | 2             | unif                | 11.67    | -80      | -48      | -16      |
| dCperDegYr | 2             | unif                | 17.5     | -179     | -108     | -36      |
| dCperDegYr | 2             | unif                | 20       | -234     | -141     | -47      |
| dCperDegYr | 2             | unif                | 25       | -365     | -220     | -74      |
| dCperDegYr | 2             | unif                | 30       | -524     | -317     | -106     |
| dCperDegYr | 2             | unif                | 35       | -569     | -397     | -144     |
| dCperDegYr | 2             | unif                | 4        | -9       | -6       | -2       |
| dCperDegYr | 2             | unif                | 5        | -15      | -9       | -3       |
| dCperDegYr | 2             | unif                | 7        | -29      | -17      | -6       |

| type       | globalWarming | warmingDistribution | timeStep | dC_qrt05 | dC_qrt50 | dC_qrt95 |
|------------|---------------|---------------------|----------|----------|----------|----------|
| dCperDegYr | 2             | unif                | 8        | -37      | -23      | -8       |
| dCperDegYr | 2             | unif                | 8.75     | -45      | -27      | -9       |
| mon1       | 2             | unif                | 0.083    | -94      | -50      | 13       |
| mon6       | 2             | unif                | 0.5      | -98      | -49      | 16       |
| wk1        | 2             | unif                | 0.019    | -95      | -49      | 13       |
| yr1        | 2             | unif                | 1        | -97      | -51      | 12       |
| yr11.6     | 2             | unif                | 11.67    | -208     | -130     | -48      |
| yr17.5     | 2             | unif                | 17.5     | -289     | -180     | -66      |
| yr35       | 2             | unif                | 35       | -564     | -402     | -161     |
| yr5        | 2             | unif                | 5        | -121     | -72      | -16      |
| yr7        | 2             | unif                | 7        | -147     | -90      | -26      |
| yr8.75     | 2             | unif                | 8.75     | -167     | -104     | -39      |
| dCperDeg   | 2             | CESM                | NA       | -200     | -105     | 18       |
| dCperDegYr | 2             | CESM                | 0.019    | 0        | 0        | 0        |
| dCperDegYr | 2             | CESM                | 0.083    | 0        | 0        | 0        |
| dCperDegYr | 2             | CESM                | 0.5      | 0        | 0        | 0        |
| dCperDegYr | 2             | CESM                | 1        | -1       | 0        | 0        |
| dCperDegYr | 2             | CESM                | 10       | -59      | -35      | -12      |
| dCperDegYr | 2             | CESM                | 11.67    | -80      | -48      | -16      |
| dCperDegYr | 2             | CESM                | 17.5     | -174     | -105     | -35      |
| dCperDegYr | 2             | CESM                | 20       | -223     | -134     | -43      |
| dCperDegYr | 2             | CESM                | 25       | -332     | -198     | -61      |
| dCperDegYr | 2             | CESM                | 30       | -428     | -261     | -74      |
| dCperDegYr | 2             | CESM                | 35       | -478     | -291     | -74      |
| dCperDegYr | 2             | CESM                | 4        | -9       | -6       | -2       |
| dCperDegYr | 2             | CESM                | 5        | -15      | -9       | -3       |
| dCperDegYr | 2             | CESM                | 7        | -29      | -17      | -6       |
| dCperDegYr | 2             | CESM                | 8        | -38      | -23      | -8       |
| dCperDegYr | 2             | CESM                | 8.75     | -45      | -27      | -9       |
| mon1       | 2             | CESM                | 0.083    | -91      | -48      | 13       |
| mon6       | 2             | CESM                | 0.5      | -95      | -47      | 16       |
| wk1        | 2             | CESM                | 0.019    | -92      | -47      | 13       |
| yr1        | 2             | CESM                | 1        | -94      | -49      | 12       |

| type   | globalWarming | warmingDistribution | timeStep | dC_qrt05 | dC_qrt50 | dC_qrt95 |
|--------|---------------|---------------------|----------|----------|----------|----------|
| yr11.6 | 2             | CESM                | 11.67    | -194     | -120     | -42      |
| yr17.5 | 2             | CESM                | 17.5     | -255     | -157     | -52      |
| yr35   | 2             | CESM                | 35       | -472     | -297     | -88      |
| yr5    | 2             | CESM                | 5        | -116     | -68      | -14      |
| yr7    | 2             | CESM                | 7        | -139     | -85      | -23      |
| yr8.75 | 2             | CESM                | 8.75     | -157     | -97      | -35      |

## Figures

### Change in carbon per degree year with bootstrap (Figure 1)

```
Fig1.theme <- theme(axis.text.x=element_text(size=18,angle=0,colour="black"),
  axis.text.y=element_text(size=18,angle=0,colour="black"),
  axis.title=element_text(size=20),
  legend.text=element_text(size=12),
  axis.line.x=element_line(color="black"),
  legend.position = "top",
  legend.key = element_rect(fill="grey95",size=0,color="grey95"),
  legend.key.size = unit(0.1,"cm"),
  legend.title = element_text(size=12,face="bold"),
  legend.background = element_rect(fill="grey95",color="black"),
  axis.line = element_line(colour = "black"),
  panel.grid.major = element_blank(),
  panel.grid.minor = element_blank(),
  strip.background = element_rect(colour = "black",size = 0.5),
  panel.background = element_rect(colour="black", fill="white"),
  panel.border = element_blank(),
  axis.ticks = element_line(colour="black"),
  legend.box = "horizontal",
  axis.title.y=element_text(vjust=1.9),
  axis.title.x=element_text(vjust=-0.4))+
  theme(legend.justification=c(1,1),
  legend.position=c(1,1))

# set color gradient
#ramp <- colorRamp(c("black","darkred","red"))
ramp <- colorRamp(c('lightgrey', 'grey', 'black'))
use.col.points <- c(rgb( ramp(seq(0, 1, length = 500))), max = 255))

# generate figure 1
fieldDepth <- 0.1
Figure1 <- ggplot(data.study,aes(x=C.control*fieldDepth, y=dC.perDegYr*fieldDepth)) +
  geom_abline(aes(intercept=parBins$intercept*fieldDepth, slope=parBins$slope),
    colour="grey",data=parBins) +
  geom_abline(intercept=0,slope=0,color="black") +
  geom_errorbar(aes(ymax=(dC.perDegYr + dC.perDegYr.se)*fieldDepth,
    ymin=(dC.perDegYr - dC.perDegYr.se)*fieldDepth),
    width=0,color="grey80",size=0.5) +
```

```

geom_point(alpha=1, aes(fill=Tdelta, size=Years), color='black', pch=21) +
scale_fill_gradientn(limits=range(c(0,data.study$Tdelta)),
                    colours=use.col.points, space="Lab", labels=c("<1",1,2,3,4,5))+
scale_size(range=c(3,10)) +
xlab(expression(atop("Standing Carbon stock", "(kg m-2)")))) +
ylab(expression(atop("Annual change in Carbon stock per"~degree* C,
                    "(kg m-2~degree*C-1~year-1)")))) +
scale_x_continuous(limits=c(0,0.130*1e3)*fieldDepth, expand = c(0, 0)) +
scale_y_continuous(limits=c(-6,6.25)*fieldDepth, expand = c(0, 0)) +
geom_hline(yintercept=6.25*fieldDepth) +
geom_vline(xintercept=130*fieldDepth) +
guides(fill = guide_legend(by.row=T,nrow = 1, label.position = "bottom",
                           label.hjust=0.5,title.position="top",
                           title=expression("Warming ("~degree*C~")"),
                           override.aes = list(size = 5),legend.box = "vertical"))+
guides(size = guide_legend(nrow = 1,label.position = "bottom",
                           label.hjust=0.5,title.position="top",
                           title=expression("Duration (years)"),
                           legend.box = "vertical")) +

Fig1.theme

print(Figure1)

```



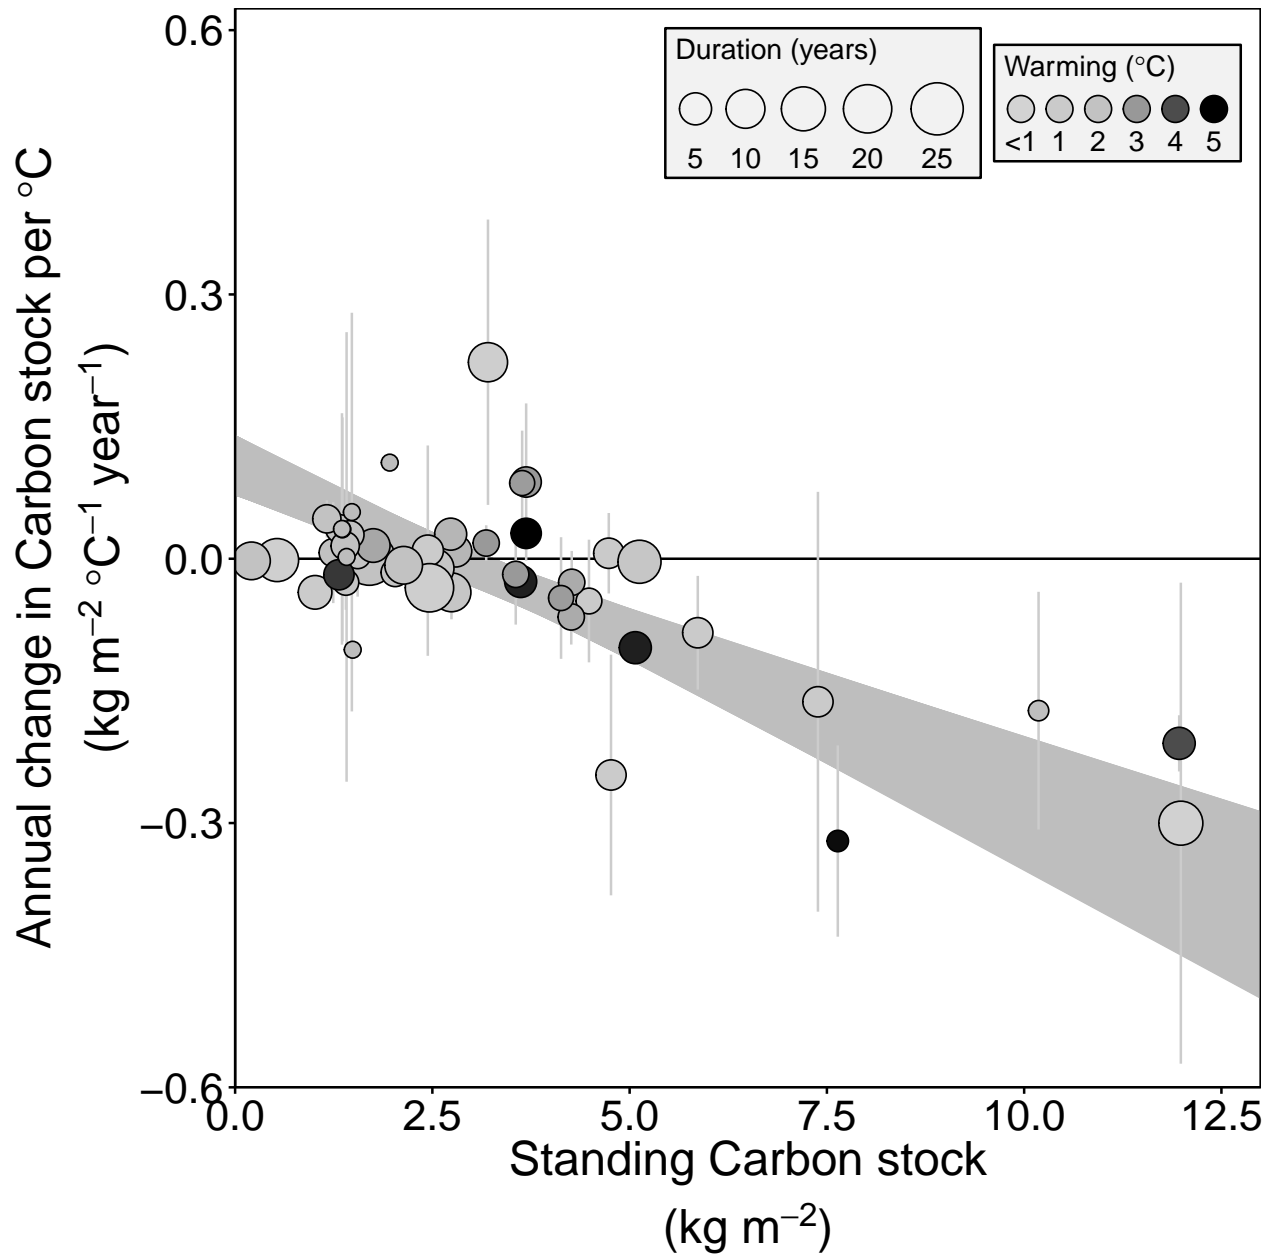

```
ggsave(plot = Figure1,
        filename='../figs/Figure01.pdf', width=7.5, height=7.5, useDingbats=FALSE)
```

Model-data plot for interactive statistical model (Figure 2a)

```
print(summary(lm.list$Cw.study))
```

```
##
## Call:
## lm(formula = C.warmed ~ C.control * degYr, data = data.study)
##
```

```
## Residuals:
##      Min       1Q   Median       3Q      Max
## -10.3269  -2.1202  -0.5347   0.8649  14.0377
##
## Coefficients:
##              Estimate Std. Error t value Pr(>|t|)
## (Intercept)    1.61834    1.56580   1.034  0.307
## C.control      0.96045    0.03789  25.350 < 2e-16 ***
## degYr          0.30065    0.12352   2.434  0.019 *
## C.control:degYr -0.01662    0.00321  -5.176 5.11e-06 ***
## ---
## Signif. codes:  0 '***' 0.001 '**' 0.01 '*' 0.05 '.' 0.1 ' ' 1
##
## Residual standard error: 4.924 on 45 degrees of freedom
## Multiple R-squared:  0.9563, Adjusted R-squared:  0.9534
## F-statistic: 328.4 on 3 and 45 DF,  p-value: < 2.2e-16
```

```
#ramp <- colorRamp(c("white", "blue", "gold", "orange", "red"))
ramp <- colorRamp(c('white', 'darkgrey'))
use.fill <- rgb( ramp(seq(0, 1, length = 255)), max = 255)
fig2aTheme <- theme(axis.text.x=element_text(size=18,angle=0,colour="black"),
                    axis.text.y=element_text(size=18,angle=0,colour="black"),
                    axis.title=element_text(size=20),
                    axis.line = element_line(colour = "black"),
                    panel.grid.major = element_blank(),
                    panel.grid.minor = element_blank(),
                    strip.background = element_rect(colour = "black",size = 0.5),
                    panel.background = element_rect(colour="black", fill="white"),
                    panel.border = element_blank(),axis.ticks = element_line(colour="black"),
                    legend.box = "vertical",
                    legend.justification=c(0.9,1), legend.position=c(0.3,1),
                    legend.key = element_rect(fill="grey95",size=0,color="grey95"),
                    legend.key.size = unit(0.5,"cm"),
                    legend.title = element_text(size=12,face="bold"),
                    legend.background = element_rect(fill="grey95",color="black"))

figure2a <- ggplot(modelData.df,aes(x=rnd.data,y=rnd.model)) +
  stat_density2d(geom = "raster",aes(fill = ..density..), contour = FALSE,
                interpolate = TRUE,n=200,show.legend=T) +
  geom_point(size=0.15,alpha=0.2,col="grey") +
  geom_point(data=summaryMD.df,aes(x=data.mean, y=model.mean),
            color="black", size=2) +
  scale_fill_gradientn(colours = use.fill) +
  geom_abline(intercept=0,slope=1,size=1)+
  scale_x_log10(limits=c(10,0.12*1e3), expand = c(0, 0),
               breaks=c(1:10)*10,labels=c(10,"",30,"",50,"",70,"",100)) +
  scale_y_log10(limits=c(10,0.12*1e3), expand = c(0, 0),
               breaks=c(1:10)*10,labels=c(10,"",30,"",50,"",70,"",100)) +
  xlab(bquote("Observed C stock (kg *m^-3*")")) +
  ylab(bquote("Predicted C stock (kg *m^-3*")")) +
  guides( fill = guide_colourbar(label.position = "bottom",
                                label.hjust=0.5,title.position="top",
                                title=expression("Point density"), direction = "horizontal")) +

fig2aTheme
```

```
print(figure2a)
```

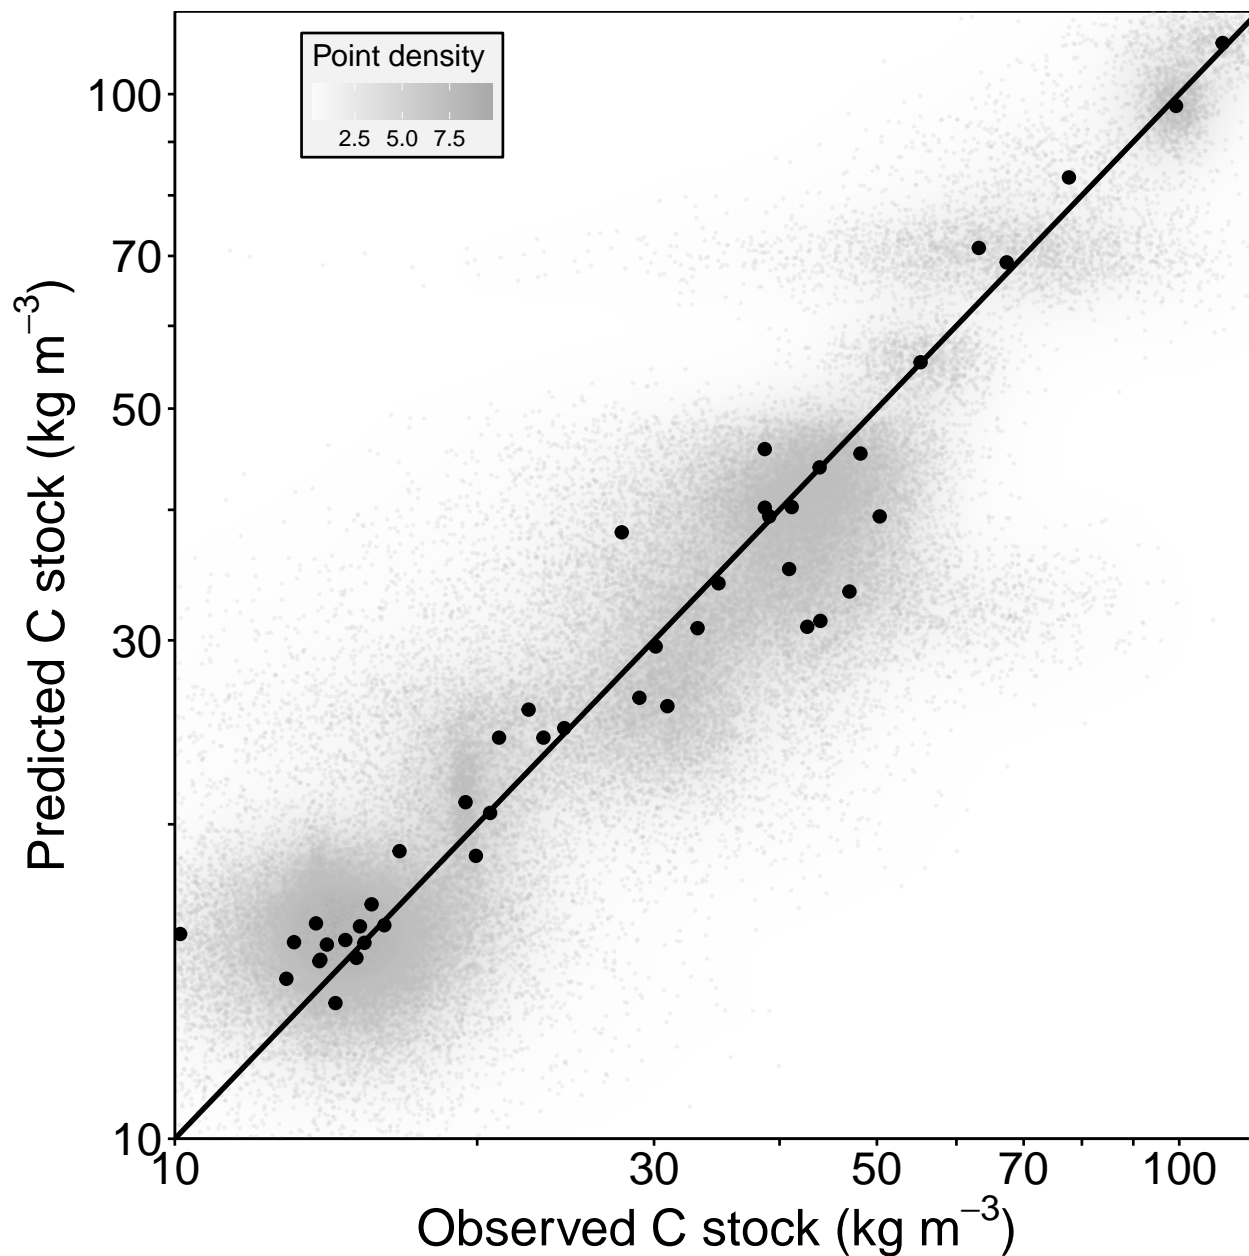

```
ggsave(plot=figure2a,  
        file='../figs/Figure02a.pdf', height=7, width=7, useDingbats=FALSE)
```

### Boot strap slope comparison (Figure 2b)

```
ggplot(selectSize.sample, aes(x=dim(data.sample)[1]-sampleSize, y=C.control)) +  
  geom_jitter(alpha=0.3,color="grey",height=0,size=0.75) +  
  scale_y_continuous(limits = c(-0.05, 0.025)) +
```

```
geom_boxplot(aes(group = cut_width(dim(data.sample)[1]-sampleSize, 5)),
             outlier.size=0, outlier.shape = NA,
             fill="white",alpha=0.5,color="black") +
geom_abline(intercept=0,slope=0,color="black") +
xlab(paste("Samples removed from ", dim(data.sample)[1])) + ylab("Slope")
```

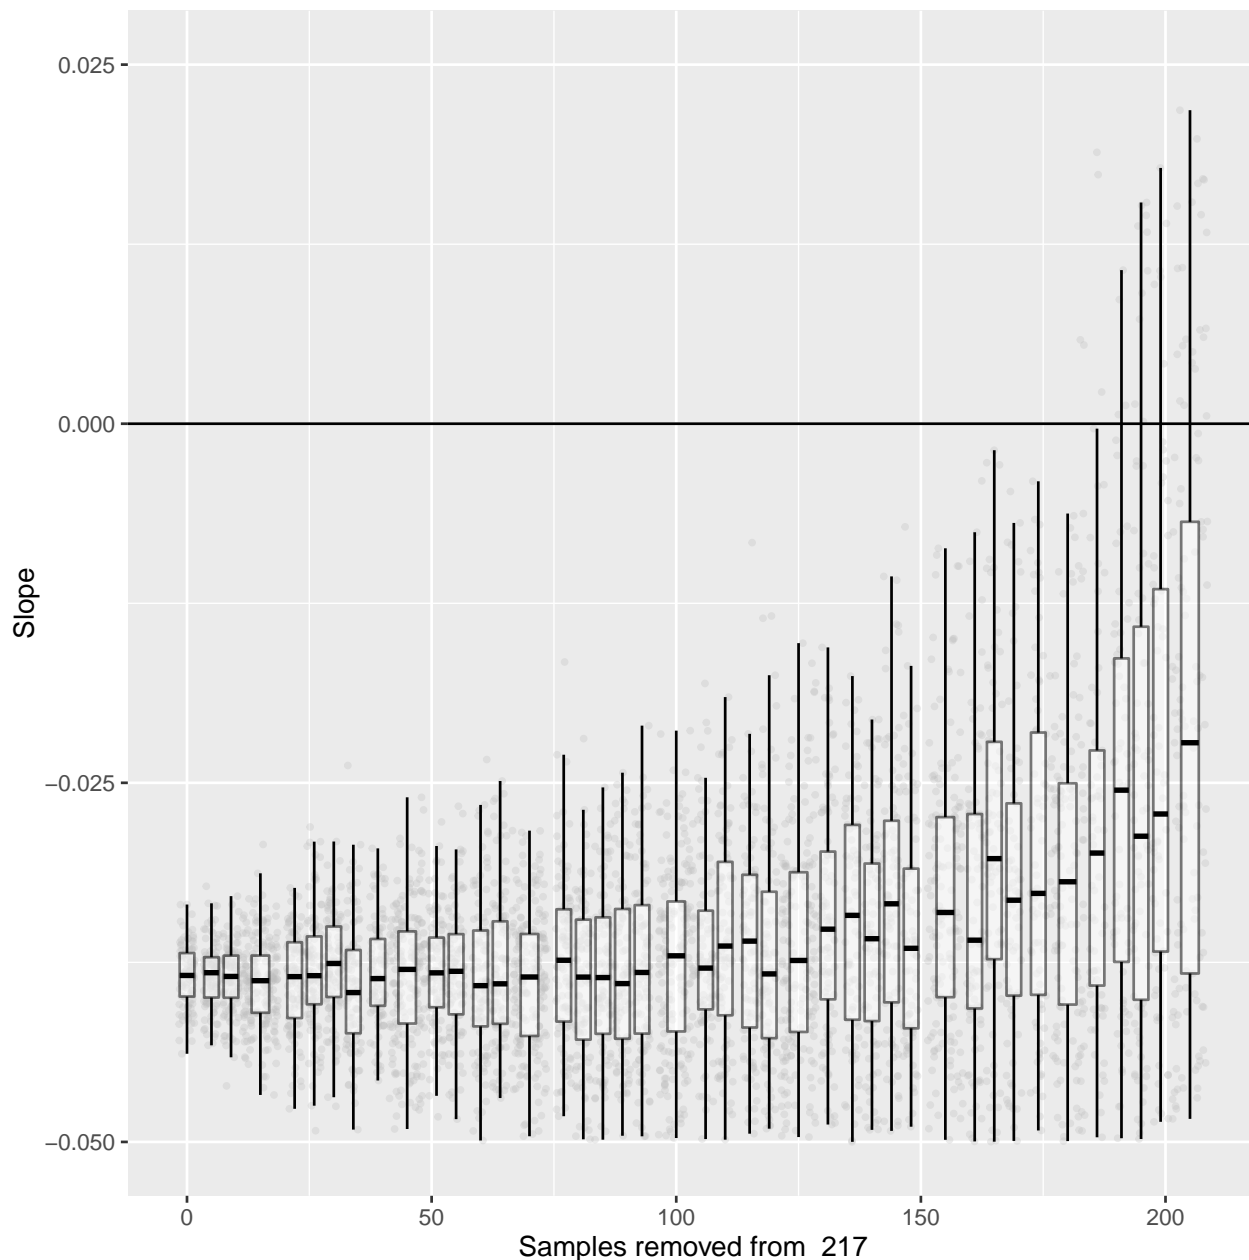

```
fig2b.pl <- ggplot(selectSize.study, aes(x=dim(data.study)[1]-sampleSize, y=C.control)) +
  geom_jitter(alpha=0.3,color="grey",height=0,size=0.75) +
  scale_y_continuous(limits = c(-0.05, 0.025)) +
  geom_boxplot(aes(group = cut_width(dim(data.study)[1]-sampleSize, 1)),
              outlier.size=0, outlier.shape = NA,
              fill="white",alpha=0.5,color="black") +
  geom_abline(intercept=0,slope=0,color="black") +
```

```
xlab(paste("Studies removed from ", dim(data.study)[1])) + ylab("Slope")

fig2bTheme <- theme(axis.text.x=element_text(size=20,angle=0,colour="black"),
  axis.text.y=element_text(size=20,angle=0,colour="black"),
  axis.title=element_text(size=28),
  axis.line = element_line(colour = "black"),
  panel.grid.major = element_blank(),
  panel.grid.minor = element_blank(),
  strip.background = element_rect(colour = "black",size = 0.5),
  panel.background = element_rect(colour="black", fill="white"),
  panel.border = element_blank(),axis.ticks = element_line(colour="black"))

print(fig2b.pl + fig2bTheme)
```

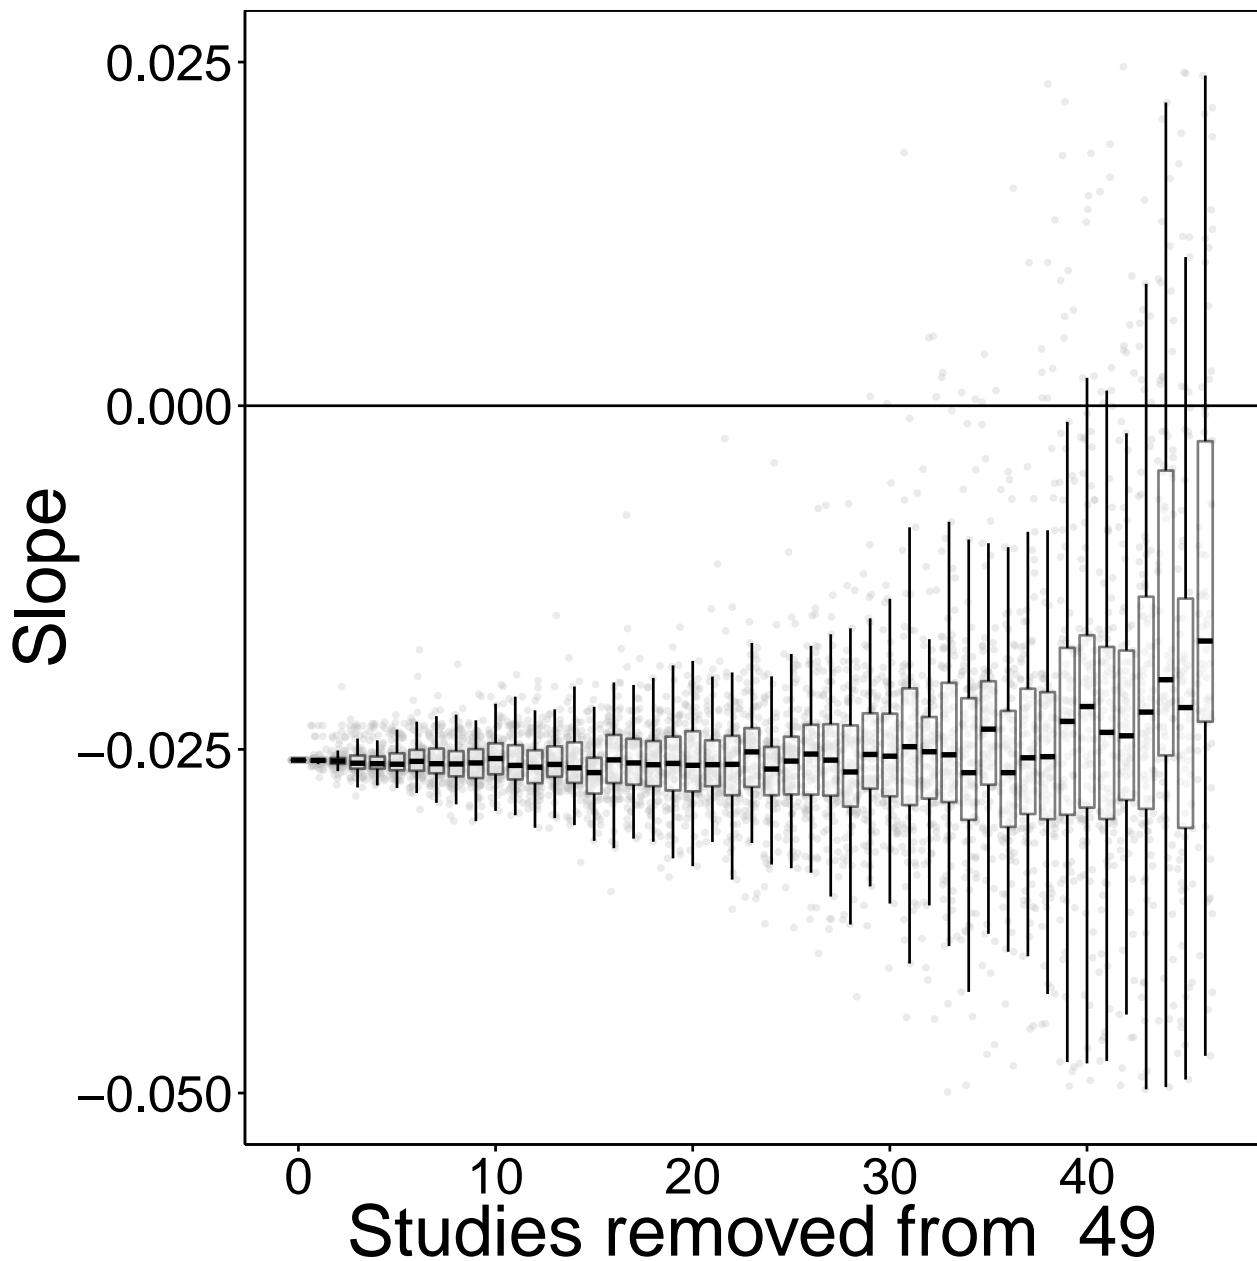

```
ggsave('../figs/Figure02b.pdf', fig2b.pl + fig2bTheme, width=7, height=7, useDingbats=FALSE)
```

### Global carbon vulnerability map (Figure 3a)

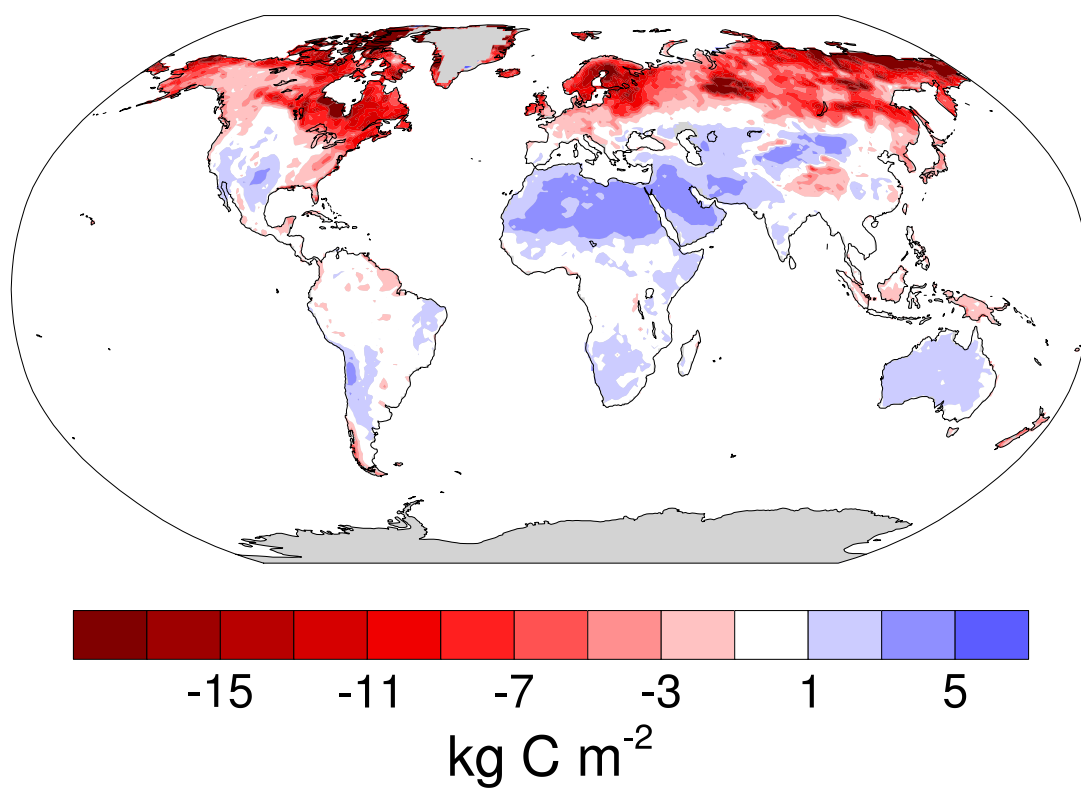

See Section “Global carbon loss map code”

## Effect-time assumptions affects soil carbon losses (Figure 3b)

```
degYrStepIntSimple.pl <- ggplot(subset(resultsTable, !grepl('dCperDeg', type) &
                                     warmingDistribution == 'CESM' &
                                     globalWarming %in% c(1,2))) +
  geom_hline(yintercept=0,col="grey",size=1) +
  geom_line(aes(x=timeStep, y=dC_qrt50, group=warming, fill=globalWarming)) +
  geom_point(aes(x=timeStep, y=dC_qrt50, fill=globalWarming), size=4, shape=21) +
  geom_ribbon(aes(x=timeStep, y=dC_qrt50, ymin=dC_qrt05, ymax=dC_qrt95,
                fill=globalWarming, guide=NA), alpha=0.2) +
  scale_x_continuous(limits=c(0,35),expand=c(0,0))+
  scale_fill_manual(values=c('#FF9900', '#FF3300'),
                   guide = guide_legend( direction = "horizontal",
                                         title = expression("Warming"*~degree*C))) +
  labs(title='', x='Effect-time',
       y="Extrapolated Carbon loss by 2050 (Pg)") +
  theme_bw() +
  theme(axis.title=element_text(size=16),
        axis.text=element_text(size=14),
        legend.position=c(0.2,0.1),
        panel.grid.major= element_line(color=NA),
        panel.grid.minor=element_line(color=NA),
        panel.border=element_rect(color="black",fill=NA,size=1),
        axis.ticks=element_line(size=0.25),
        legend.key=element_rect(color="black",fill=NA,size=0.25))
print(degYrStepIntSimple.pl)
```

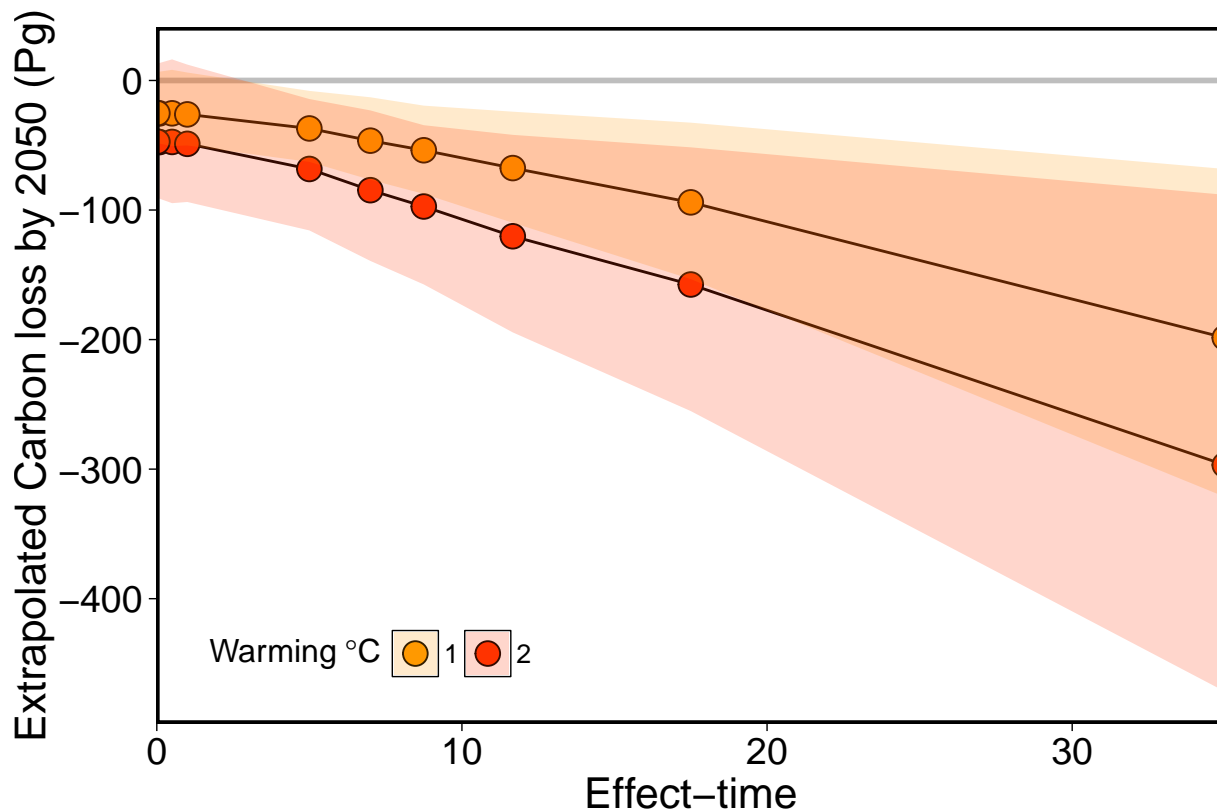



```
ggsave(degYrStepIntSimple.pl, filename='../figs/Figure03b.pdf',  
        height=4.5, width=6.5, useDingbats=FALSE)
```

## Data summary and basic visualizations

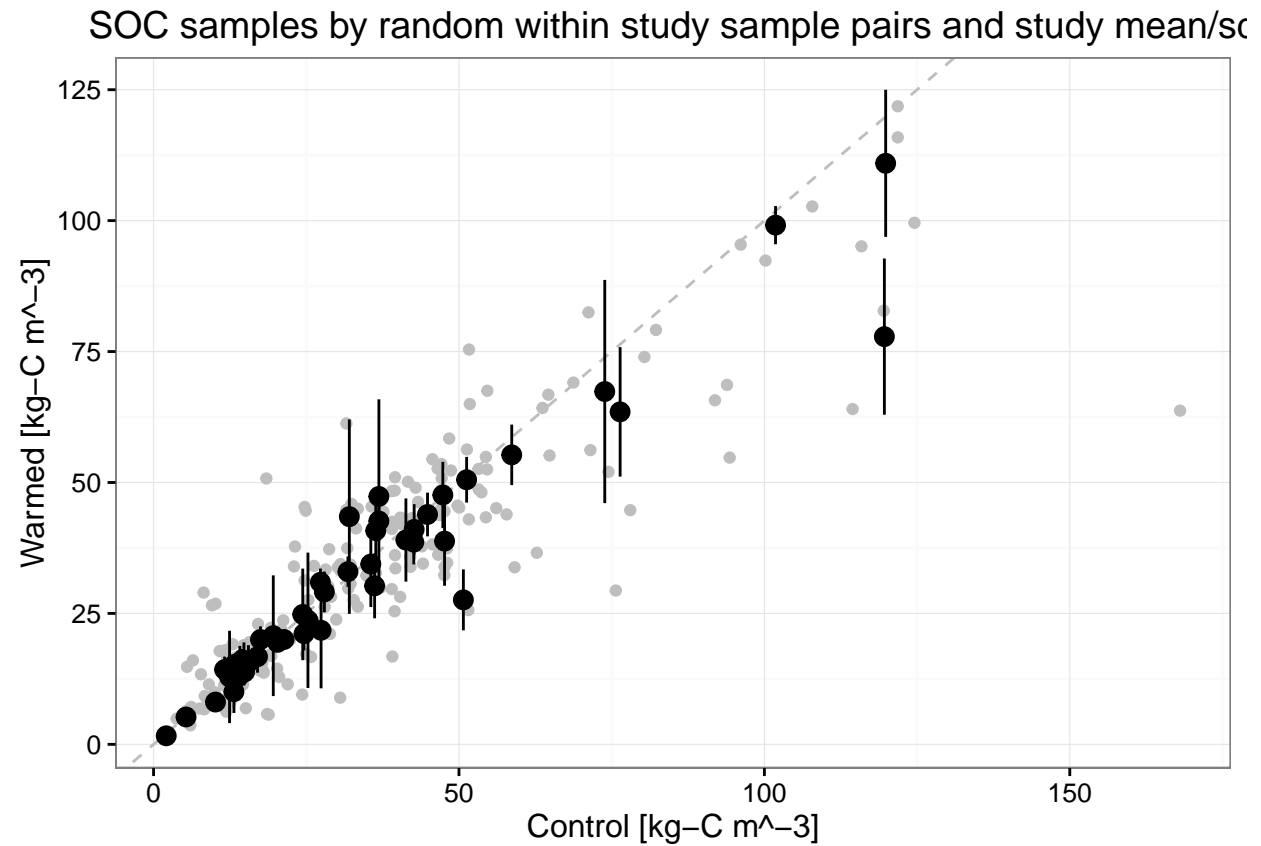

```
## Using Biome_GIS as id variables  
## `stat_bin()` using `bins = 30`. Pick better value with `binwidth`.
```

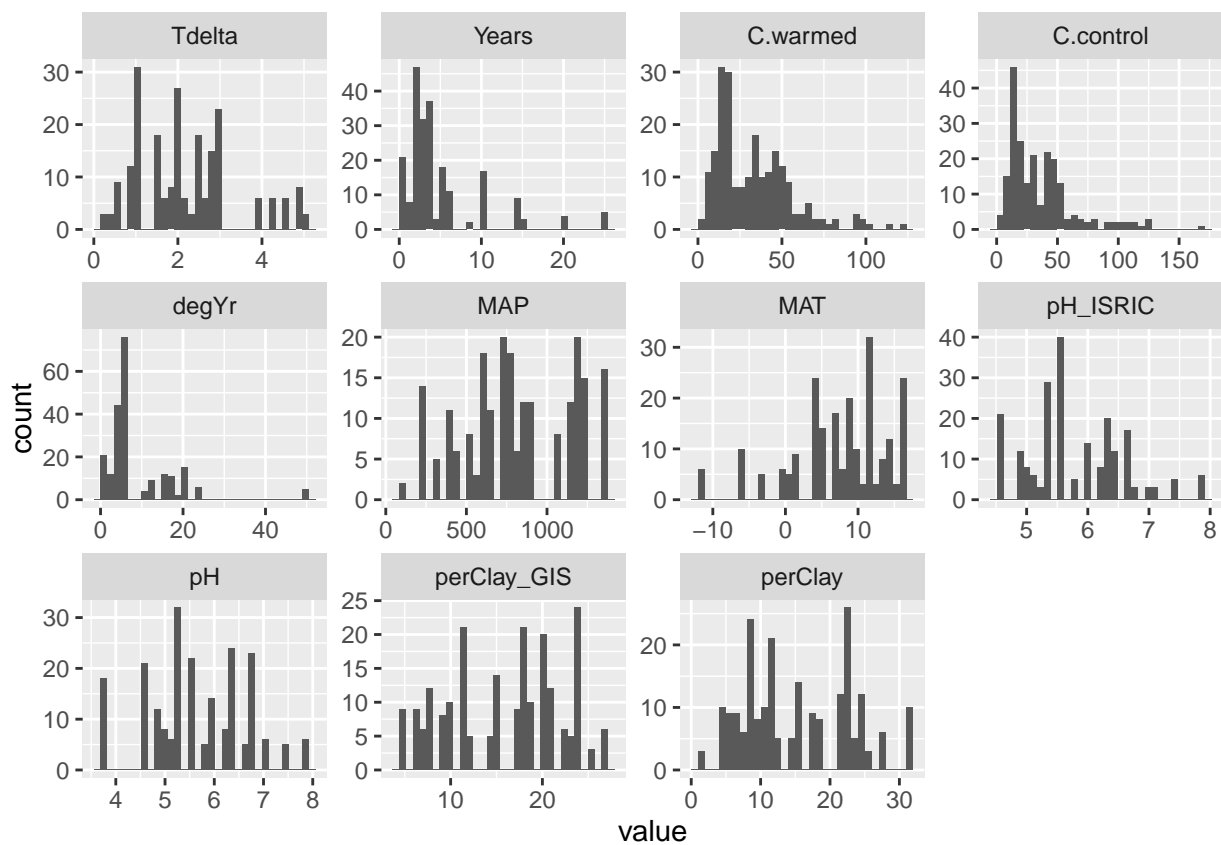

```
## `stat_bin()` using `bins = 30`. Pick better value with `binwidth`.
```

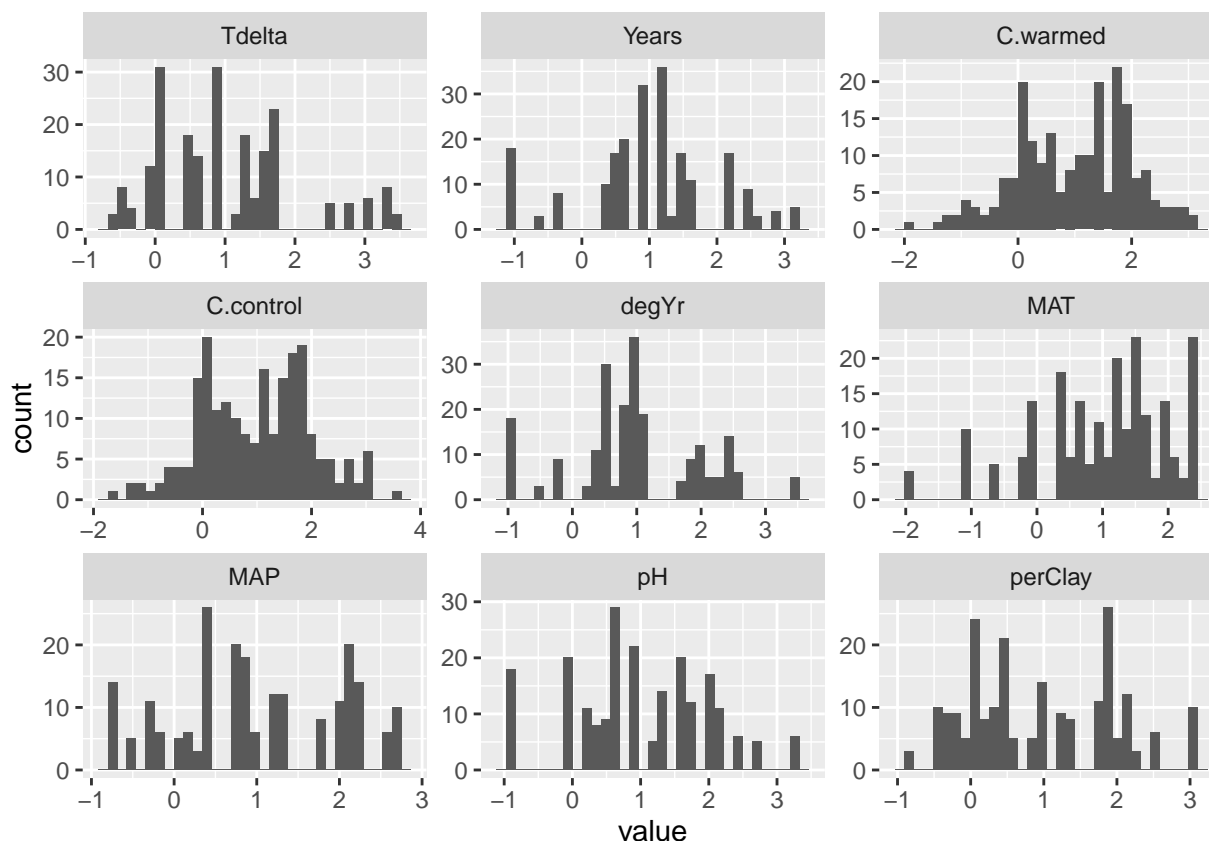

Table 6: Description of study sites including mean annual temperature (MAT), mean annual precipitation (MAP), soil pH, and soil percent clay (perClay). For standardization purposes, all climate data were collected from Bioclim and all soil data were collected from SoilGrids, unless data was provided by study.

| Study Description                               | MAT  | MAP  | pH  | perClay |
|-------------------------------------------------|------|------|-----|---------|
| Delta Junction, AK, USA                         | -3.2 | 298  | 6.6 | 12      |
| Ford Forest, MI, USA                            | 4.4  | 824  | 5.3 | 8       |
| Ford Forest, MI, USA [precipitation]            | 4.4  | 824  | 5.3 | 8       |
| FRAGILE Experiment, Svalbard, Norway [grazed]   | -5.7 | 226  | 6   | 10      |
| FRAGILE Experiment, Svalbard, Norway            | -5.7 | 226  | 6   | 10      |
| INCREASE Clocaenog, Wales, UK                   | 7.1  | 1215 | 5.2 | 11      |
| Gucheng, Hebei, China                           | 12.7 | 543  | 7   | 17      |
| Soil Warming x Nitrogen Addition Study, NH, USA | 6.8  | 1142 | 4.9 | 7       |
| Rocky Mountain Biological Laboratory, CO, USA   | 0.5  | 519  | 5.8 | 14      |
| INCREASE Kiskunsag, Hungary                     | 10.9 | 536  | 7.1 | 1       |
| INCREASE Brandbjerg, Demark Krycklan, Sweden    | 8.2  | 603  | 5.5 | 8       |
| Krycklan, Sweden                                | 1    | 609  | 4.6 | 5       |
| Jasper Ridge, CA, USA                           | 13.7 | 635  | 6.2 | 18      |
| Jasper Ridge, CA, USA [CO <sub>2</sub> ]        | 13.7 | 635  | 6.2 | 18      |
| Oak Ridge, Tennessee, USA                       | 13.9 | 1347 | 5.6 | 27      |
| Oak Ridge, Tennessee, USA [CO <sub>2</sub> ]    | 13.9 | 1347 | 5.6 | 27      |

| Study Description                                                                                 | MAT   | MAP  | pH  | perClay |
|---------------------------------------------------------------------------------------------------|-------|------|-----|---------|
| Oklahoma Tall Grass Prairie, OK, USA<br>[clipped grass]                                           | 16.3  | 906  | 6.7 | 8       |
| Oklahoma Tall Grass Prairie, OK, USA<br>Research Station of Songnen Grassland<br>Ecosystem, China | 16.3  | 906  | 6.7 | 8       |
| Duke Forest, NC, USA [3 degrees]                                                                  | 5.2   | 436  | 7.9 | 17      |
| Duke Forest, NC, USA [5 degrees]                                                                  | 14.4  | 1161 | 4.9 | 22      |
| Konza Prairie, KS, USA                                                                            | 14.4  | 1161 | 4.9 | 22      |
| Whitehall, GA, USA [3 degrees]                                                                    | 12    | 872  | 6.4 | 24      |
| Whitehall, GA, USA [5 degrees]                                                                    | 16.5  | 1230 | 4.6 | 21      |
| Dry Heath Env. Control, Sweden                                                                    | 16.5  | 1230 | 4.6 | 21      |
| Prairie Heating and CO2 Enrichment,<br>WY, USA                                                    | -0.1  | 390  | 5.1 | 6       |
| INCREASE Garraf, Spain                                                                            | 7     | 384  | 7.4 | 23      |
| HOCC-Experiment, Germany                                                                          | 15.5  | 632  | 6.8 | 25      |
| HOCC-Experiment, Germany<br>[precipitation 1]                                                     | 8.9   | 729  | 6.3 | 22      |
| HOCC-Experiment, Germany<br>[precipitation 2]                                                     | 8.9   | 729  | 6.3 | 22      |
| HOCC-Experiment, Germany<br>[precipitation 3]                                                     | 8.9   | 729  | 6.8 | 22      |
| HOCC-Experiment, Germany<br>[precipitation 4]                                                     | 8.9   | 729  | 6.8 | 22      |
| BioCON, MN, USA [elevated C02,<br>ambient N, negative H20]                                        | 8.9   | 729  | 6.8 | 22      |
| BioCON, MN, USA [elevated C02,<br>elevated N, negative H20]                                       | 3.8   | 761  | 3.8 | 11      |
| BioCON, MN, USA [elevated C02,<br>elevated N, ambient H20]                                        | 3.8   | 761  | 3.8 | 11      |
| BioCON, MN, USA [ambient C02,<br>ambient N, ambient H20]                                          | 3.8   | 761  | 3.8 | 11      |
| BioCON, MN, USA [ambient C02,<br>elevated N, negative H20]                                        | 3.8   | 761  | 3.8 | 11      |
| BioCON, MN, USA [ambient C02,<br>elevated N, ambient H20]                                         | 3.8   | 761  | 3.8 | 11      |
| Heating of Prairie Systems 1, OR, USA                                                             | 11.4  | 1194 | 5.3 | 31      |
| Heating of Prairie Systems 1, OR, USA<br>[precipitation]                                          | 11.4  | 1194 | 5.3 | 31      |
| Heating of Prairie Systems 2, OR, USA<br>[precipitation]                                          | 11.4  | 1364 | 5.5 | 15      |
| Heating of Prairie Systems 3, WA, USA<br>[precipitation]                                          | 10.1  | 1199 | 5.3 | 4       |
| Heating of Prairie Systems 2, OR, USA                                                             | 11.4  | 1364 | 5.5 | 15      |
| Heating of Prairie Systems 3, WA, USA                                                             | 10.1  | 1199 | 5.3 | 4       |
| INCREASE Mols, Denmark                                                                            | 7.4   | 592  | 5.3 | 6       |
| Arctic LTER, AK, USA                                                                              | -11.2 | 237  | 6   | 15      |
| Hubbard Brook, NH, USA                                                                            | 5.4   | 1082 | 5   | 9       |
| ITEX, Greenland                                                                                   | -11.3 | 112  | NA  | NA      |
| ITEX, Greenland [vegetated]                                                                       | -11.3 | 112  | NA  | NA      |

Table 7: Mean soil carbon [kg-C m<sup>-3</sup>] values across control study site with number of samples in each study for the control plots.

| Study Description                                                                  | count.control | C.control | C.sd.control |
|------------------------------------------------------------------------------------|---------------|-----------|--------------|
| Delta Junction, AK, USA                                                            | 5             | 32.05     | NA           |
| Ford Forest, MI, USA                                                               | 3             | 36.19     | NA           |
| Ford Forest, MI, USA [precipitation]                                               | 3             | 50.72     | NA           |
| FRAGILE Experiment, Svalbard, Norway [grazed]                                      | 5             | 58.64     | NA           |
| FRAGILE Experiment, Svalbard, Norway                                               | 5             | 73.87     | NA           |
| INCREASE Clocaenog, Wales, UK                                                      | 3             | 119.9     | NA           |
| Gucheng, Hebei, China                                                              | 3             | 101.8     | NA           |
| Soil Warming x Nitrogen Addition Study, NH, USA                                    | 6             | 119.6     | NA           |
| Rocky Mountain Biological Laboratory, CO, USA                                      | 5             | 17.02     | NA           |
| INCREASE Kiskunsag, Hungary                                                        | 3             | 5.32      | NA           |
| INCREASE Brandbjerg, Demark                                                        | 6             | 10.13     | NA           |
| Krycklan, Sweden                                                                   | 9             | 44.85     | NA           |
| Jasper Ridge, CA, USA                                                              | 4             | 14.04     | NA           |
| Jasper Ridge, CA, USA [CO <sub>2</sub> ]                                           | 4             | 15.53     | NA           |
| Oak Ridge, Tennessee, USA                                                          | 3             | 27.96     | NA           |
| Oak Ridge, Tennessee, USA [CO <sub>2</sub> ]                                       | 3             | 27.32     | NA           |
| Oklahoma Tall Grass Prairie, OK, USA [clipped grass]                               | 6             | 27.42     | NA           |
| Oklahoma Tall Grass Prairie, OK, USA                                               | 6             | 25.27     | NA           |
| Research Station of Songnen Grassland Ecosystem, China                             | 6             | 20.29     | NA           |
| Duke Forest, NC, USA [3 degrees]                                                   | 3             | 36.89     | NA           |
| Duke Forest, NC, USA [5 degrees]                                                   | 3             | 36.89     | NA           |
| Konza Prairie, KS, USA                                                             | 12            | 47.36     | NA           |
| Whitehall, GA, USA [3 degrees]                                                     | 6             | 12.44     | NA           |
| Whitehall, GA, USA [5 degrees]                                                     | 5             | 13.16     | NA           |
| Dry Heath Env. Control, Sweden                                                     | 6             | 51.25     | NA           |
| Prairie Heating and CO <sub>2</sub> Enrichment, WY, USA                            | 5             | 17.51     | NA           |
| INCREASE Garraf, Spain                                                             | 3             | 24.42     | NA           |
| HOCC-Experiment, Germany                                                           | 4             | 13.84     | NA           |
| HOCC-Experiment, Germany [precipitation 1]                                         | 4             | 13.26     | NA           |
| HOCC-Experiment, Germany [precipitation 2]                                         | 4             | 11.63     | NA           |
| HOCC-Experiment, Germany [precipitation 3]                                         | 4             | 14.55     | NA           |
| HOCC-Experiment, Germany [precipitation 4]                                         | 4             | 13.95     | NA           |
| BioCON, MN, USA [elevated CO <sub>2</sub> , ambient N, negative H <sub>2</sub> O]  | 3             | 13.59     | NA           |
| BioCON, MN, USA [elevated CO <sub>2</sub> , elevated N, negative H <sub>2</sub> O] | 3             | 19.6      | NA           |
| BioCON, MN, USA [elevated CO <sub>2</sub> , elevated N, ambient H <sub>2</sub> O]  | 3             | 14.91     | NA           |

| Study Description                                                                 | count.control | C.control | C.sd.control |
|-----------------------------------------------------------------------------------|---------------|-----------|--------------|
| BioCON, MN, USA [ambient CO <sub>2</sub> , ambient N, ambient H <sub>2</sub> O]   | 3             | 14.13     | NA           |
| BioCON, MN, USA [ambient CO <sub>2</sub> , elevated N, negative H <sub>2</sub> O] | 3             | 14.8      | NA           |
| BioCON, MN, USA [ambient CO <sub>2</sub> , elevated N, ambient H <sub>2</sub> O]  | 3             | 13.54     | NA           |
| Heating of Prairie Systems 1, OR, USA                                             | 5             | 42.6      | NA           |
| Heating of Prairie Systems 1, OR, USA [precipitation]                             | 5             | 42.66     | NA           |
| Heating of Prairie Systems 2, OR, USA [precipitation]                             | 5             | 31.82     | NA           |
| Heating of Prairie Systems 3, WA, USA [precipitation]                             | 5             | 36.38     | NA           |
| Heating of Prairie Systems 2, OR, USA                                             | 5             | 35.57     | NA           |
| Heating of Prairie Systems 3, WA, USA                                             | 5             | 41.31     | NA           |
| INCREASE Mols, Denmark                                                            | 3             | 47.64     | NA           |
| Arctic LTER, AK, USA                                                              | 4             | 24.63     | NA           |
| Hubbard Brook, NH, USA                                                            | 8             | 76.38     | NA           |
| ITEX, Greenland                                                                   | 1             | 2.071     | NA           |
| ITEX, Greenland [vegetated]                                                       | 1             | 21.36     | NA           |

Table 8: Mean soil carbon [kg-C m<sup>-3</sup>] values across warmed study site with number of samples in each study for the warmed plots, their warming treatment [C], and length of treatment [years].

| Study Description                               | Tdelta | Years  | count.warmed | C.warmed | C.sd.warmed |
|-------------------------------------------------|--------|--------|--------------|----------|-------------|
| Delta Junction, AK, USA                         | 0.5    | 10.25  | 5            | 43.48    | 18.56       |
| Ford Forest, MI, USA                            | 4.581  | 5      | 3            | 30.27    | 6.201       |
| Ford Forest, MI, USA [precipitation]            | 4.581  | 5      | 3            | 27.59    | 5.819       |
| FRAGILE Experiment, Svalbard, Norway [grazed]   | 1      | 4      | 5            | 55.28    | 5.773       |
| FRAGILE Experiment, Svalbard, Norway            | 1      | 4      | 5            | 67.37    | 21.31       |
| INCREASE Clocaenog, Wales, UK                   | 0.198  | 15     | 3            | 110.9    | 14.04       |
| Gucheng, Hebei, China                           | 2.34   | 0.6667 | 3            | 99.14    | 3.645       |
| Soil Warming x Nitrogen Addition Study, NH, USA | 3.989  | 5      | 5            | 77.85    | 14.91       |
| Rocky Mountain Biological Laboratory, CO, USA   | 2      | 25     | 5            | 16.74    | 3.056       |
| INCREASE Kiskunsag, Hungary                     | 0.44   | 14     | 3            | 5.227    | 1.773       |
| INCREASE Brandbjerg, Demark                     | 0.9    | 6      | 6            | 8.075    | 1.399       |
| Krycklan, Sweden                                | 1      | 2      | 9            | 43.89    | 4.177       |
| Jasper Ridge, CA, USA                           | 1.773  | 2      | 4            | 13.09    | 2.205       |
| Jasper Ridge, CA, USA [CO <sub>2</sub> ]        | 1.773  | 2      | 4            | 15.65    | 3.289       |
| Oak Ridge, Tennessee, USA                       | 2.6    | 5      | 3            | 29.1     | 3.886       |

| Study Description                                           | Tdelta | Years | count.warmed | C.warmed | C.sd.warmed |
|-------------------------------------------------------------|--------|-------|--------------|----------|-------------|
| Oak Ridge, Tennessee, USA<br>[CO2]                          | 2.6    | 5     | 3            | 30.94    | 2.625       |
| Oklahoma Tall Grass Prairie,<br>OK, USA [clipped grass]     | 1.479  | 10    | 6            | 21.78    | 11.09       |
| Oklahoma Tall Grass Prairie,<br>OK, USA                     | 1.479  | 10    | 6            | 23.69    | 12.93       |
| Research Station of Songnen<br>Grassland Ecosystem, China   | 1.75   | 3     | 6            | 19.47    | 0.3409      |
| Duke Forest, NC, USA [3<br>degrees]                         | 3      | 4     | 3            | 47.34    | 18.54       |
| Duke Forest, NC, USA [5<br>degrees]                         | 5      | 4     | 3            | 42.64    | 3.876       |
| Konza Prairie, KS, USA                                      | 1      | 4     | 12           | 47.61    | 6.327       |
| Whitehall, GA, USA [3 degrees]                              | 2.096  | 3     | 6            | 12.87    | 8.818       |
| Whitehall, GA, USA [5 degrees]                              | 4.27   | 4     | 6            | 10.05    | 4.062       |
| Dry Heath Env. Control,<br>Sweden                           | 1.5    | 14    | 6            | 50.53    | 4.366       |
| Prairie Heating and CO2<br>Enrichment, WY, USA              | 2.8    | 6     | 5            | 20.03    | 2.494       |
| INCREASE Garraf, Spain                                      | 0.94   | 4.5   | 3            | 24.81    | 8.746       |
| HOCC-Experiment, Germany                                    | 1.954  | 3     | 4            | 15.47    | 2.457       |
| HOCC-Experiment, Germany<br>[precipitation 1]               | 1.954  | 3     | 4            | 15.25    | 1.427       |
| HOCC-Experiment, Germany<br>[precipitation 2]               | 1.954  | 3     | 4            | 14.28    | 2.466       |
| HOCC-Experiment, Germany<br>[precipitation 3]               | 1.954  | 3     | 4            | 16.14    | 2.043       |
| HOCC-Experiment, Germany<br>[precipitation 4]               | 1.954  | 3     | 4            | 14.81    | 2.861       |
| BioCON, MN, USA [elevated<br>CO2, ambient N, negative H2O]  | 2.5    | 0.42  | 3            | 13.94    | 2.312       |
| BioCON, MN, USA [elevated<br>CO2, elevated N, negative H2O] | 2.5    | 0.42  | 3            | 20.74    | 11.53       |
| BioCON, MN, USA [elevated<br>CO2, elevated N, ambient H2O]  | 2.5    | 0.42  | 3            | 13.82    | 0.1774      |
| BioCON, MN, USA [ambient<br>CO2, ambient N, ambient H2O]    | 2.5    | 0.42  | 3            | 14.15    | 4.641       |
| BioCON, MN, USA [ambient<br>CO2, elevated N, negative H2O]  | 2.5    | 0.42  | 3            | 15.35    | 4.115       |
| BioCON, MN, USA [ambient<br>CO2, elevated N, ambient H2O]   | 2.5    | 0.42  | 3            | 13.9     | 2.389       |
| Heating of Prairie Systems 1,<br>OR, USA                    | 2.75   | 2.2   | 5            | 38.6     | 4.242       |
| Heating of Prairie Systems 1,<br>OR, USA [precipitation]    | 2.75   | 2.2   | 5            | 41.04    | 4.821       |
| Heating of Prairie Systems 2,<br>OR, USA [precipitation]    | 2.98   | 2.16  | 5            | 32.97    | 2.909       |
| Heating of Prairie Systems 3,<br>WA, USA [precipitation]    | 2.94   | 1.75  | 5            | 40.8     | 6.846       |
| Heating of Prairie Systems 2,<br>OR, USA                    | 2.98   | 2.16  | 5            | 34.42    | 8.201       |

| Study Description                        | Tdelta | Years  | count.warmed | C.warmed | C.sd.warmed |
|------------------------------------------|--------|--------|--------------|----------|-------------|
| Heating of Prairie Systems 3,<br>WA, USA | 2.94   | 1.75   | 5            | 39.01    | 7.942       |
| INCREASE Mols, Denmark                   | 0.9    | 4      | 3            | 38.8     | 8.516       |
| Arctic LTER, AK, USA                     | 0.53   | 20     | 4            | 21.14    | 3.201       |
| Hubbard Brook, NH, USA                   | 4.83   | 0.8333 | 8            | 63.48    | 12.36       |
| ITEX, Greenland                          | 2      | 9      | 1            | 1.635    | NA          |
| ITEX, Greenland [vegetated]              | 2      | 9      | 1            | 20.02    | NA          |

Table 9: Biome of study sites. For standardization purposes, biome allocations were generated using the UNEP biomes map, unless data was provided by study.

| Study Description                                         | Biome                                            |
|-----------------------------------------------------------|--------------------------------------------------|
| Delta Junction, AK, USA                                   | Boreal Forests/Taiga                             |
| Ford Forest, MI, USA                                      | Temperate Broadleaf and Mixed Forests            |
| Ford Forest, MI, USA [precipitation]                      | Temperate Broadleaf and Mixed Forests            |
| FRAGILE Experiment, Svalbard, Norway<br>[grazed]          | Tundra                                           |
| FRAGILE Experiment, Svalbard, Norway                      | Tundra                                           |
| INCREASE Clocaenog, Wales, UK                             | Temperate Grasslands, Savannas and<br>Shrublands |
| Gucheng, Hebei, China                                     | Temperate Grasslands, Savannas and<br>Shrublands |
| Soil Warming x Nitrogen Addition Study,<br>NH, USA        | Temperate Broadleaf and Mixed Forests            |
| Rocky Mountain Biological Laboratory, CO,<br>USA          | Temperate Grasslands, Savannas and<br>Shrublands |
| INCREASE Kiskunsag, Hungary                               | Temperate Grasslands, Savannas and<br>Shrublands |
| INCREASE Brandbjerg, Demark<br>Krycklan, Sweden           | Temperate Broadleaf and Mixed Forests            |
| Jasper Ridge, CA, USA                                     | Boreal Forests/Taiga                             |
| Jasper Ridge, CA, USA [CO2]                               | Temperate Grasslands, Savannas and<br>Shrublands |
| Oak Ridge, Tennessee, USA                                 | Temperate Broadleaf and Mixed Forests            |
| Oak Ridge, Tennessee, USA [CO2]                           | Temperate Broadleaf and Mixed Forests            |
| Oklahoma Tall Grass Prairie, OK, USA<br>[clipped grass]   | Temperate Grasslands, Savannas and<br>Shrublands |
| Oklahoma Tall Grass Prairie, OK, USA                      | Temperate Grasslands, Savannas and<br>Shrublands |
| Research Station of Songnen Grassland<br>Ecosystem, China | Temperate Grasslands, Savannas and<br>Shrublands |
| Duke Forest, NC, USA [3 degrees]                          | Temperate Broadleaf and Mixed Forests            |
| Duke Forest, NC, USA [5 degrees]                          | Temperate Broadleaf and Mixed Forests            |
| Konza Prairie, KS, USA                                    | Temperate Grasslands, Savannas and<br>Shrublands |
| Whitehall, GA, USA [3 degrees]                            | Temperate Broadleaf and Mixed Forests            |
| Whitehall, GA, USA [5 degrees]                            | Temperate Broadleaf and Mixed Forests            |
| Dry Heath Env. Control, Sweden                            | Tundra                                           |



| Study Description                                        | Biome                                         |
|----------------------------------------------------------|-----------------------------------------------|
| Prairie Heating and CO2 Enrichment, WY, USA              | Temperate Grasslands, Savannas and Shrublands |
| INCREASE Garraf, Spain                                   | Mediterranean Forests, Woodlands and Scrub    |
| HOCC-Experiment, Germany                                 | Temperate Grasslands, Savannas and Shrublands |
| HOCC-Experiment, Germany [precipitation 1]               | Temperate Grasslands, Savannas and Shrublands |
| HOCC-Experiment, Germany [precipitation 2]               | Temperate Grasslands, Savannas and Shrublands |
| HOCC-Experiment, Germany [precipitation 3]               | Temperate Grasslands, Savannas and Shrublands |
| HOCC-Experiment, Germany [precipitation 4]               | Temperate Grasslands, Savannas and Shrublands |
| BioCON, MN, USA [elevated CO2, ambient N, negative H2O]  | Temperate Broadleaf and Mixed Forests         |
| BioCON, MN, USA [elevated CO2, elevated N, negative H2O] | Temperate Broadleaf and Mixed Forests         |
| BioCON, MN, USA [elevated CO2, elevated N, ambient H2O]  | Temperate Broadleaf and Mixed Forests         |
| BioCON, MN, USA [ambient CO2, ambient N, ambient H2O]    | Temperate Broadleaf and Mixed Forests         |
| BioCON, MN, USA [ambient CO2, elevated N, negative H2O]  | Temperate Broadleaf and Mixed Forests         |
| BioCON, MN, USA [ambient CO2, elevated N, ambient H2O]   | Temperate Broadleaf and Mixed Forests         |
| Heating of Prairie Systems 1, OR, USA                    | Temperate Grasslands, Savannas and Shrublands |
| Heating of Prairie Systems 1, OR, USA [precipitation]    | Temperate Grasslands, Savannas and Shrublands |
| Heating of Prairie Systems 2, OR, USA [precipitation]    | Temperate Grasslands, Savannas and Shrublands |
| Heating of Prairie Systems 3, WA, USA [precipitation]    | Temperate Grasslands, Savannas and Shrublands |
| Heating of Prairie Systems 2, OR, USA                    | Temperate Grasslands, Savannas and Shrublands |
| Heating of Prairie Systems 3, WA, USA                    | Temperate Grasslands, Savannas and Shrublands |
| INCREASE Mols, Denmark                                   | Temperate Grasslands, Savannas and Shrublands |
| Arctic LTER, AK, USA                                     | Tundra                                        |
| Hubbard Brook, NH, USA                                   | Temperate Broadleaf and Mixed Forests         |
| ITEX, Greenland                                          | Tundra                                        |
| ITEX, Greenland [vegetated]                              | Tundra                                        |

## Helper functions

### Bootstrap function

```
print(bootStrap.fn)
```

```
## function (data, myFormula, nRuns, sampleSize, lm.weights = NULL,
##   shuffleFn = NULL, numCoef, verbose = FALSE)
## {
##   sampleIndex <- matrix(NA, nrow = nRuns, ncol = sampleSize)
##   lmStats <- matrix(NA, nrow = nRuns, ncol = numCoef + 3)
##   for (ii in 1:nRuns) {
##     if (verbose)
##       cat(ii, "\n")
##     if (!is.null(shuffleFn))
##       data <- shuffleFn(data)
##     if (verbose)
##       print(head(data))
##     sampleIndex[ii, ] <- sample(1:(dim(data)[1]), size = sampleSize)
##     temp.lm <- lm(myFormula, data[sampleIndex[ii, ], ])
##     fstatArr <- summary(temp.lm)$fstatistic
##     if (verbose)
##       print(summary(temp.lm))
##     lmStats[ii, ] <- c(temp.lm$coefficients, pf(fstatArr[1],
##       fstatArr[2], fstatArr[3], lower.tail = FALSE), adj.r.squared = summary(temp.lm)$adj.r.sq
##       r.squared = summary(temp.lm)$r.squared)
##   }
##   lmStats <- as.data.frame(lmStats)
##   names(lmStats) <- c(names(temp.lm$coefficients), "p.value",
##     "adj.r.squared", "r.squared")
##   if (verbose)
##     cat("\n")
##   if (verbose)
##     print(lmStats)
##   return(lmStats)
## }
```

### Read data

```
print(readSamples)
```

```
## function (filename = "../data/Soil Data Compiled_January 26.xlsx",
##   useMeanBD = TRUE, readControlMeans = FALSE)
## {
##   data <- read.xlsx2(filename, sheetIndex = 1, colIndex = c(1,
##     7, 9, 10, 11, 12))
##   names(data) <- c("Study", "Treatment", "Tdelta", "Years",
##     "perC", "bulk_density")
##   data$Tdelta <- round(data$Tdelta, 3)
```

```

## data$perC <- round(data$perC, 3)
## data$bulk_density <- round(data$bulk_density, 3)
## if (useMeanBD) {
##   study.bd <- ddply(data[, c("Study", "bulk_density")],
##     .(Study), summarize, bulk_density.sd = sd(bulk_density),
##     bulk_density = mean(bulk_density))
##   data$bulk_density.sd <- NULL
##   data$bulk_density <- NULL
##   data <- merge(study.bd, data)
## }
## data$C <- data$perC/100 * data$bulk_density
## data.sample <- ddply(data, c("Study", "Tdelta", "Years"),
##   function(xx) {
##     warmed <- xx$C[xx$Treatment == "W"]
##     control <- xx$C[xx$Treatment == "C"]
##     if (readControlMeans) {
##       return(data.frame(C.warmed = warmed, C.control = mean(control)))
##     }
##     else {
##       mismatch <- length(warmed) - length(control)
##       if (mismatch > 0) {
##         control <- c(control, rep(NA, mismatch))
##       }
##       else {
##         warmed <- c(warmed, rep(NA, abs(mismatch)))
##       }
##       return(data.frame(C.warmed = warmed, C.control = sample(control)))
##     }
##   })
## data.sample$degYr <- data.sample$Years * data.sample$Tdelta
## return(data.sample)
## }

```

## Construct study means and standard deviations

```
print(readStudyMeans)
```

```

## function (filename = "../data/Soil Data Compiled_January 26.xlsx",
##   includeBD.sd = FALSE, includeControl.sd = FALSE)
## {
##   data <- read.xlsx2(filename, sheetIndex = 1, colIndex = c(1,
##     7, 9, 10, 11, 12))
##   names(data) <- c("Study", "Treatment", "Tdelta", "Years",
##     "perC", "bulk_density")
##   data$Tdelta <- round(as.numeric(data$Tdelta), 3)
##   data$perC <- as.numeric(data$perC)
##   data$bulk_density <- as.numeric(data$bulk_density)
##   data.study <- ddply(data, .(Study, Tdelta, Years, Treatment),
##     summarize, bulk_density.sd = sd(bulk_density), bulk_density = mean(bulk_density),
##     perC.sd = sd(perC), perC = mean(perC), count = length(Treatment))
##   if (includeBD.sd) {
##     data.study$C.sd <- sqrt(data.study$perC/100^2 * data.study$bulk_density.sd^2 +

```

```

##           data.study$perC.sd/100^2 * data.study$bulk_density^2)
##     }
##     else {
##       study.bd <- ddply(data[, c("Study", "bulk_density")],
##         .(Study), summarize, bulk_density = mean(bulk_density))
##       data.study$bulk_density.sd <- NULL
##       data.study$bulk_density <- NULL
##       data.study <- merge(study.bd, data.study)
##       data.study$C.sd <- sqrt((data.study$perC.sd/100 * data.study$bulk_density)^2)
##     }
##     data.study$C <- data.study$perC/100 * data.study$bulk_density
##     data.study <- merge(subset(data.study, Treatment == "W",
##       select = -Treatment), subset(data.study, Treatment ==
##       "C", select = -Treatment), by = c("Study", "Years", "Tdelta"),
##       suffixes = c(".warmed", ".control"))
##     if (!includeControl.sd)
##       data.study$C.sd.control <- 0
##     data.study$degYr <- data.study$Years * data.study$Tdelta
##     data.study$dC <- data.study$C.warmed - data.study$C.control
##     data.study$dC.sd <- sqrt(data.study$C.sd.warmed^2 + data.study$C.sd.control^2)
##     data.study$dC.perDegYr <- data.study$dC/data.study$degYr
##     data.study$dC.perDegYr.sd <- data.study$dC.sd/data.study$degYr
##     if (!includeControl.sd)
##       data.study$C.sd.control <- NA
##     data.study$C.se.control <- data.study$C.sd.control/data.study$count.control
##     data.study$C.se.warmed <- data.study$C.sd.warmed/data.study$count.warmed
##     data.study$dC.perDegYr.se <- data.study$dC.perDegYr.sd/sqrt(rowMeans(data.study[,
##       c("count.warmed", "count.control")]))
##     return(data.study)
##   }

```

## Convert R data.frame to netCDF file

```
cat(readLines('../R/Crowther_dSOC_35yr_makeNC.R'), sep = '\n')
```

```

## # Crowther_dSOC_35yr_makeNC.r
## # Will Wieder
## # July 2016
## # converts .csv to .nc file
## # data reordered go give increasing lat & lon values
##
## library(ncdf)
## library(reshape2)
## library(raster)
## library(rgdal)
##
## #dir <- getwd() #"/Users/wwieder/Desktop/Working_files/Crowther_warming/KTB_results/"
## #setwd(dir)
## file <- "../R/Crowther_dSOC_35yr_makeNC.R"
## fin <- "../data/Crowther_dSOC_35yr.csv"
## Data <- read.csv(fin)
## names(Data)

```

```

##
## minLAT <- min(Data$lat)
## maxLAT <- max(Data$lat)
## minLON <- min(Data$lon)
## maxLON <- max(Data$lon)
##
## attach(Data)
## names(Data)
##
## #set up depth, lat, lon coordinates
## nLAT <- length(as.numeric(levels(as.factor(lat))))
## nLON <- length(as.numeric(levels(as.factor(lon))))
##
## #LAT <- seq(minLAT,maxLAT,(90 - 89.05759))
## latDATA <- read.csv('../data/LAT.csv') # some rounding errors, read in CSV of LAT from CLM
## LAT <- latDATA$LAT
## LON <- seq(minLON,maxLON,(360/nLON))
## nOBS <- length(Data$dC.single)
## dims <- c(nLAT, nLON)
##
## #something wrong w/ how lat values ordered in .csv file
## #rewrite lat so values have a regular step (as I think they should...)
## lat2 <- rep(NA, length(lat))
## start <- 1
## for (i in 1:nLAT) {
##   end <- start + nLON-1
##   lat2[start:end] <- LAT[i]
##   start <- end + 1
## }
## #-----
## # Define Variables
## #-----
##
## VARS <- c('SOC','landArea','dC.single','dC.multi')
## nVARS <- length(VARS)
## # close VARS loop
## gridSOC <- rasterFromXYZ(data.frame(Data$lon,lat2,Data$SOC), digits=2)
## gridSOC <- t(flip(gridSOC, direction='y') )
##
## gridArea <- rasterFromXYZ(data.frame(Data$lon,lat2,Data$landArea), digits=2)
## gridArea <- t(flip(gridArea, direction='y') )
##
## gridSingle <- rasterFromXYZ(data.frame(Data$lon,lat2,Data$dC.single), digits=2)
## gridSingle <- t(flip(gridSingle, direction='y') )
##
## gridMulti <- rasterFromXYZ(data.frame(Data$lon,lat2,Data$dC.multi), digits=2)
## gridMulti <- t(flip(gridMulti, direction='y') )
##
## #-----
## #-----write out .nc file-----
## #-----
## # define the netcdf coordinate variables (name, units, type)
## lat <- dim.def.ncdf("lat","degrees_north", as.double(LAT), create_dimvar=TRUE)
## lon <- dim.def.ncdf("lon","degrees_east", as.double(LON), create_dimvar=TRUE)

```

```

## mv      <- -9999.          # missing value to use
## LATIXY  <- var.def.ncdf("LATIXY", "degrees N", list(lat), mv,
##                      longname="latitude", prec="double")
## LONGXY  <- var.def.ncdf("LONGXY", "degrees E", list(lon), mv,
##                      longname="longitude", prec="double")
## SOC_i   <- var.def.ncdf("SOC_i", units="kg C/m2", list(lon,lat), mv,
##                      longname="Soil C", prec="double")
## area    <- var.def.ncdf("Area", units="m2", list(lon,lat), mv,
##                      longname="grid_area", prec="double")
## dC_Single <- var.def.ncdf("dC_Single", units="kg C/m2", list(lon,lat), mv,
##                      longname="Single Step", prec="double")
## dC_Multi <- var.def.ncdf("dC_Multi", units="kg C/m2", list(lon,lat), mv,
##                      longname="Multi Step", prec="double")
##
## fname <- '../data/Crowther_dSOC_35y.nc'
## ncnew <- create.ncdf( fname, list(LATIXY, LONGXY, SOC_i, area, dC_Single, dC_Multi) )
##
## # Write some values to this variable on disk.
## put.var.ncdf( ncnew, LATIXY, LAT)
## put.var.ncdf( ncnew, LONGXY, LON)
## put.var.ncdf( ncnew, SOC_i,   as.array(gridSOC))
## put.var.ncdf( ncnew, area,   as.array(gridArea))
## put.var.ncdf( ncnew, dC_Single,as.array(gridSingle))
## put.var.ncdf( ncnew, dC_Multi ,as.array(gridMulti))
##
## att.put.ncdf( ncnew, 0, "created_on",date()      ,prec=NA,verbose=FALSE,definemode=FALSE )
## att.put.ncdf( ncnew, 0, "created_by","Will Wieder",prec=NA,verbose=FALSE,definemode=FALSE )
## att.put.ncdf( ncnew, 0, "created_from",fin       ,prec=NA,verbose=FALSE,definemode=FALSE )
## att.put.ncdf( ncnew, 0, "created_with",file     ,prec=NA,verbose=FALSE,definemode=FALSE )
##
## close.ncdf(ncnew)
##
## print('-----Wrote out .nc files-----')
## print(ncnew)

```

## Main analysis script

### sessionInfo()

R version 3.2.2 (2015-08-14)

Platform: x86\_64-apple-darwin13.4.0 (64-bit)

Running under: OS X 10.10.5 (Yosemite)

locale:

[1] en\_US.UTF-8/en\_US.UTF-8/en\_US.UTF-8/C/en\_US.UTF-8/en\_US.UTF-8

attached base packages:

[1] stats graphics grDevices utils datasets methods base

other attached packages:

[1] ncdf4\_1.15 xlsx\_0.5.7 xlsxjars\_0.6.1 rJava\_0.9-7

[5] deSolve\_1.12 lme4\_1.1-10 Matrix\_1.2-3 MASS\_7.3-45

```

[9] reshape2_1.4.1 pander_0.6.0   plyr_1.8.3   ggplot2_2.0.0

loaded via a namespace (and not attached):
 [1] Rcpp_0.12.2      knitr_1.11      magrittr_1.5   splines_3.2.2
 [5] munsell_0.4.2    colorspace_1.2-6 lattice_0.20-33 minqa_1.2.4
 [9] stringr_1.0.0    tools_3.2.2     grid_3.2.2     gtable_0.1.2
[13] nlme_3.1-122     htmltools_0.2.6 yaml_2.1.13    digest_0.6.8
[17] nloptr_1.0.4     formatR_1.2.1   evaluate_0.8    rmarkdown_0.8.1
[21] labeling_0.3     stringi_1.0-1   scales_0.3.0

cat(readLines('../R/CrowtherFieldWarmingScript.R'), sep = '\n')

library(ggplot2) #make pretty plots
library(plyr) #deal with data frames nicely
library(pander) #format tables
panderOptions('table.split.table', Inf) #do not let pander split tables because bad numbering
library(reshape2) #deal with data frames nicely
library(MASS) #model selection
library(lme4) #random vs fixed effects model
library(deSolve) #solve ode
library(xlsx) #read in excel files

source('../R/bootStrap.fn.R')
source('../R/readSamples.R')
source('../R/readStudyMeans.R')

verbose <- FALSE

##Helper functions
shuffle.sample <- function(data){
  idCol <- setdiff(names(data), c('C.warmed', 'C.control'))
  return(ddply(data, idCol, summarize,
               C.warmed=sample(C.warmed, size=length(Study)),
               C.control=sample(C.control, size=length(Study))))
}

pullPvalue <- function(temp.lm){
  fstatArr <- summary(temp.lm)$fstatistic
  return(pf(fstatArr[1], fstatArr[2], fstatArr[3], lower.tail = FALSE))
}

##Read in data
studyMeta <- read.xlsx2('../data/Soil Data Compiled_September 6, 2016.xlsx',
                        sheetIndex=2, colIndex=c(1, 9, 10, 11, 12, 13, 14, 17, 18),
                        stringsAsFactors=FALSE)
names(studyMeta) <- c('Study', 'MAP', 'MAT', 'Biome_GIS', 'Biome', 'pH_ISRIC', 'pH', 'perClay_GIS', 'perClay')
studyMeta$pH <- as.numeric(as.character(studyMeta$pH))
studyMeta$perClay <- as.numeric(as.character(studyMeta$perClay))

studyMeta <- studyMeta[studyMeta$Study != '',]

##Replace missing data with data products
cat('Replacing ', sum(grepl('^NA$', studyMeta$Biome)), 'of ', dim(studyMeta)[1], ' missing biomes with data products')
studyMeta$Biome[grepl('^NA$', studyMeta$Biome)] <- studyMeta$Biome_GIS[grepl('^NA$', studyMeta$Biome)]

```

```

cat('Replacing ', sum(is.na(studyMeta$pH)), 'of ', dim(studyMeta)[1], ' site missing pH values with data
studyMeta$pH[is.na(studyMeta$pH)] <- studyMeta$pH_ISRIC[is.na(studyMeta$pH)]

cat('Replacing ', sum(is.na(studyMeta$perClay)), 'of ', dim(studyMeta)[1], ' site missing percent clay v
studyMeta$perClay[is.na(studyMeta$perClay)] <- studyMeta$perClay_GIS[is.na(studyMeta$perClay)]

#read study names
studyNames <- read.xlsx2('../data/Soil Data Compiled_September 6, 2016.xlsx',
                        sheetIndex=7)
names(studyNames) <- c('Study', 'Study Description')
data.sample <- readSamples(filename='../data/Soil Data Compiled_September 6, 2016.xlsx')
data.study <- readStudyMeans(filename='../data/Soil Data Compiled_September 6, 2016.xlsx')

if(!identical( setdiff(studyMeta$Study, data.sample$Study),
                  setdiff(data.sample$Study, studyMeta$Study)) |
    !identical(setdiff(studyMeta$Study, studyNames$Study),
                setdiff(studyNames$Study, studyMeta$Study))){
  stop('study names do not match')
}

##Convert from g cm-3 to kg m-3
data.sample[, c('C.warmed', 'C.control')] <- data.sample[, c('C.warmed', 'C.control')] * 1e3
data.study[, c('bulk_density.warmed', 'C.sd.warmed', 'C.warmed', 'bulk_density.control',
               'C.sd.control', 'C.control', 'dC', 'dC.sd', 'dC.perDegYr', 'dC.perDegYr.sd',
               'C.se.control', 'C.se.warmed', 'dC.perDegYr.se')] <-
  data.study[,
              c('bulk_density.warmed', 'C.sd.warmed', 'C.warmed', 'bulk_density.control',
                'C.sd.control', 'C.control', 'dC', 'dC.sd', 'dC.perDegYr', 'dC.perDegYr.sd',
                'C.se.control', 'C.se.warmed', 'dC.perDegYr.se')] * 1e3

##Rescale data
#There is clear skew in the histograms of the years, degree-years, and carbon stocks.
#We log-transformed these variables to normalize the distribution for statistical purposes.

data.sample.plus <- merge(data.sample, studyMeta[,c('Study', 'MAT', 'MAP', 'pH', 'perClay')],
                          by='Study', all=TRUE)
data.sample.plus$degYr <- data.sample.plus$Years*data.sample.plus$Tdelta
fullRows <- apply(subset(data.sample.plus, select=-Study), c(1),
                  function(xx){all(is.finite(xx))})

if(verbose) print(sprintf('Throwing out %d samples (rows) because of missing values somewhere.',
                          sum(!fullRows)))

data.sample.plus <- data.sample.plus[fullRows,]
ggplot(melt(subset(data.sample.plus, select=-Study))) +
  geom_histogram(aes(x=value)) + facet_wrap(~variable, scale='free')
cor(subset(data.sample.plus, select=-Study))

data.sample.plus.rescaled <- data.sample.plus

data.sample.plus.rescaled$degYr <- log(data.sample.plus.rescaled$degYr)
data.sample.plus.rescaled$Years <- log(data.sample.plus$Years)

```



```

data.sample.plus.rescaled$C.control <- log(data.sample.plus$C.control)
data.sample.plus.rescaled$C.warmed <- log(data.sample.plus$C.warmed)

data.sample.plus.rescaled[, -1] <- as.data.frame(apply(
  data.sample.plus.rescaled[, -1], c(2), function(xx){
    return((xx-mean(xx, na.rm=TRUE))/sd(xx, na.rm=TRUE)+1)
  }))

##Construct LMER
lmer.list <- list(simple = lmer(C.warmed ~ C.control + (1|Study),
  data=data.sample.plus.rescaled),
  additive.dT = lmer(C.warmed~C.control+Tdelta + (1|Study),
  data=data.sample.plus.rescaled),
  additive.all = lmer(C.warmed~C.control+MAP+MAT+pH+degYr + perClay + (1|Study),
  data=data.sample.plus.rescaled),
  additive.enviro = lmer(C.warmed~C.control+MAP+MAT+pH + perClay+ (1|Study),
  data=data.sample.plus.rescaled),
  additive.treat = lmer(C.warmed~C.control+degYr + (1|Study),
  data=data.sample.plus.rescaled),
  interactive = lmer(C.warmed~C.control*degYr+ (1|Study),
  data=data.sample.plus.rescaled),
  interactive.dT = lmer(C.warmed~C.control*Tdelta+ (1|Study),
  data=data.sample.plus.rescaled))

##Construct LM
lm.list <- list(Cw.sample = lm(C.warmed ~ C.control * degYr, data.sample),
  Cw.sample.dT = lm(C.warmed ~ C.control * Tdelta, data.sample),
  dC.sample = lm(C.warmed - C.control ~ C.control * degYr, data.sample),
  dC.dT.sample = lm(C.warmed - C.control ~ C.control * Tdelta, data.sample),
  dCperDegYr.sample = lm((C.warmed-C.control)/(Years*Tdelta) ~ C.control,
  data.sample),
  dCperDeg.sample = lm((C.warmed-C.control)/Tdelta ~ C.control,
  data.sample),
  Cw.study = lm(C.warmed ~ C.control * degYr, data.study),
  Cw.study.dT = lm(C.warmed ~ C.control * Tdelta, data.study),
  dC.study = lm(C.warmed - C.control ~ C.control * degYr, data.study),
  dC.dT.study = lm(C.warmed - C.control ~ C.control * Tdelta, data.study),
  dCperDegYr.study = lm((C.warmed-C.control)/(Years*Tdelta) ~ C.control,
  data.study),
  dCperDeg.study = lm((C.warmed-C.control)/Tdelta ~ C.control,
  data.study))

modelFits <- ldply(lm.list,
  function(xx){
    data.frame(model=as.character(xx$call)[2],
      data=as.character(xx$call)[3],
      adjR2 = sprintf('%0.3f', summary(xx)$adj.r.squared),
      pvalue=sprintf('%0.3g', pullPvalue(xx)))
  })

##Sample model vs data distributions
interactive.model <- function(pars=summary(lm.list$Cw.study)$coefficients,
  C.control, C.sd.control, degYr){

```

```

C_degYr.par <- rnorm(1, mean=pars['C.control:degYr', 'Estimate'],
                    sd=pars['C.control:degYr', 'Std. Error'])
C.par <- rnorm(1, mean=pars['C.control', 'Estimate'], sd=pars['C.control', 'Std. Error'])
degYr.par <- rnorm(1, mean=pars['degYr', 'Estimate'], sd=pars['degYr', 'Std. Error'])
inter.par <- rnorm(1, mean=pars['(Intercept)', 'Estimate'],
                  sd=pars['(Intercept)', 'Std. Error'])
model <- inter.par+ C.par*C.control + degYr.par*degYr + C_degYr.par*C.control*degYr

return(model)
}

modelData.df <- data.frame()
for(ii in 1:1000){
  modelData.df <- rbind(modelData.df,
                        data.frame(index = 1:length(data.study$C.warmed),
                                   rnd.data=rnorm(n=length(data.study$C.warmed),
                                                  mean=data.study$C.warmed,
                                                  sd=data.study$C.sd.warmed),
                                   rnd.model =
                                   interactive.model(C.control=data.study$C.control,
                                                    C.sd.control=data.study$C.sd.control,
                                                    degYr=data.study$degYr)))
}

summaryMD.df <- ddply(modelData.df, 'index', summarize,
                      data.mean=mean(rnd.data), data.sd=sd(rnd.data),
                      model.mean=mean(rnd.model), model.sd=sd(rnd.model))

##bootstrap slope
selectSize.sample <- adply(floor(seq(10, dim(data.sample)[1], length=50)), c(1),
                           function(xx){
  ans <- bootStrap.fn(
    myFormula=(C.warmed-C.control)/(Years*Tdelta) ~ C.control,
    data=data.sample, nRuns=100, sampleSize=xx, numCoef=2,
    shuffleFn=shuffle.sample)
  ans$sampleSize <- xx
  return(ans)
})

selectSize.study <- adply(3:(dim(data.study)[1]), c(1),
                         function(xx){
  ans <- bootStrap.fn(
    myFormula=(C.warmed-C.control)/(Years*Tdelta) ~ C.control,
    data=data.study, nRuns=100, sampleSize=xx, numCoef=2)
  ans$sampleSize <- xx
  return(ans)
})

##Pull CI for parameters from subset samples
dCperDeg.boot <- bootStrap.fn(
  myFormula=(C.warmed-C.control)/Tdelta ~ C.control,
  data=data.sample, nRuns=1e3, sampleSize=200, numCoef=2, shuffleFn=shuffle.sample)

```

```

dCperDegYr.boot <- bootStrap.fn(
  myFormula=(C.warmed-C.control)/(Years*Tdelta) ~ C.control,
  data=data.sample, nRuns=1e3, sampleSize=200, numCoef=2, shuffleFn=shuffle.sample)

dCperDegYr.mod.boot <- llply(list(wk1=1/52, mon1 = 1/12, mon6 = 6/12, yr1 = 1,
                                yr4 = 4, yr5 = 5, yr7 = 7, yr8 = 8,
                                yr8.75= 8.75, yr10 = 10, yr11.6=35/3,
                                yr15 = 15,
                                yr17.5=17.5, yr20 = 20, yr25 = 25, yr30 = 30, yr35 = 35),
  function(xx){
    data.sample$Years.mod <- data.sample$Years
    data.sample$Years.mod[data.sample$Years.mod > xx] <- xx
    ans <- bootStrap.fn(
      myFormula = (C.warmed-C.control)/(Years.mod*Tdelta) ~ C.control,
      data=data.sample, nRuns=1e3, sampleSize=200,
      numCoef=2, shuffleFn=shuffle.sample, verbose=FALSE)
    return(ans)
  })

parKDE <- kde2d(dCperDegYr.boot$C.control, dCperDegYr.boot$`(Intercept)`, n=100)
parBins <- melt(parKDE$z)
parBins <- subset(parBins, value > max(value)*0.01)
parBins$slope <- parKDE$x[parBins$Var1]
parBins$intercept <- parKDE$y[parBins$Var2]
parBins$alpha <- parBins$value/max(parBins$value)

parRange <- ldply(c(list(dCperDegYr = dCperDegYr.boot,
                        dCperDeg = dCperDeg.boot),
                    dCperDegYr.mod.boot), function(xx){
  ans <- as.data.frame(apply(xx, c(2),
                             quantile, c(0.05, 0.5, 0.95)))
  ans$qrt <- c(0.05, 0.5, 0.95)
  return(ans)
})

names(parRange)[1:3] <- c('type', 'intercept', 'C')
save(file='../data/parCIforLM.RData', parRange)

```

## Extrapolation code

```
cat(readLines('../R/globalExtrapolations.R'), sep='\n')
```

```

###Set up
library(ncdf4)
library(ggplot2)
library(plyr)
verbose <- FALSE
dataDir <- '../data/'
readIn.tsl <- TRUE

```

```
#####
###Read in maps
inputs.ls <- list(soilGrid=list(filename='SoilGrids_0.9x1.25.nc',
                                varName='OCSTHA_M',
                                units='tonnes ha^-1', #conversion factor 1/10 for kg m^-2
                                depthWeight=c(1, 1, 0, 0, 0, 0)),
                  #mid points c(2.5 10.0 22.5 45.0 80.0 150.0) cm
                  #implies 5cm, 10cm, 15cm, 30cm, 60cm, 60cm layer lengths
                  #take top 15cm

                  HWSD=list(filename='surfdata_0.9x1.25_simyr2000_c120906_HWSD_soil.nc',
                              varName='DOM_SOC', #dominant mapping unit;
                              #alt area weighted AWT_SOC
                              units='kg C m^-2',
                              depthWeight=c(1, 0)), #0-30 cm, 30-70 cm soil layers
                  landfrac=list(filename='sftlf_fx_CESM1-BGC_historical_r0i0p0.nc',
                                varName='sftlf',
                                units='percent'),
                  gridArea=list(filename='areacella_fx_CESM1-BGC_historical_r0i0p0.nc',
                                varName='areacella',
                                units='m2'))

maps.ls <- lapply(inputs.ls, function(args){
  ncin <- nc_open(sprintf('%s%s', dataDir, args$filename))
  if(verbose) print(ncin)
  lon <- ncvar_get(ncin, 'lon') #longitude
  lat <- ncvar_get(ncin, 'lat') #longitude
  ans <- ncvar_get(ncin, args$varName)
  nc_close(ncin)

  if(!is.null(args$depthWeight)){
    ans <- apply(ans, c(1,2), function(xx){sum(args$depthWeight*xx)})
  }

  dimnames(ans) <- list(lon=lon, lat=lat)
  ans <- as.data.frame.table(ans, stringsAsFactors=FALSE, responseName='value')
  ans <- as.data.frame(lapply(ans, as.numeric))

  return(ans)
})

maps.ls$landArea <- merge(maps.ls$gridArea, maps.ls$landfrac,
                          by=c('lon', 'lat'), suffixes=c('.area', '.perc'))
maps.ls$landArea$value <- maps.ls$landArea$value.area*maps.ls$landArea$value.perc/100

if(readIn.tsl){
  #CESM1-BGC Soil Temperature
  ##Pre-processing in cdo
  ##$cdo yearmean tsl_Lmon_CESM1-BGC_rcp85_r1i1p1_200601-204912.nc
  ##          tsl_yrmean_CESM1-BGC_rcp85_r1i1p1_200601-204912.nc
  ##$cdo sellevidx,1,2,3,4 tsl_yrmean_CESM1-BGC_rcp85_r1i1p1_200601-204912.nc temp.nc
  ##$cdo vertmean temp.nc tsl_yrShortMean_CESM1-BGC_rcp85_r1i1p1_200601-204912.nc

  ncin <- nc_open(sprintf('%stsl_yrShortMean_CESM1-BGC_rcp85_r1i1p1_200601-204912.nc',

```

```

                                dataDir))
if(verbose) print(ncin)
tsl <- nvar_get(ncin, 'tsl') #units K
lon <- nvar_get(ncin, 'lon') #longitude
lat <- nvar_get(ncin, 'lat') #longitude
time <- nvar_get(ncin, 'time') #days since 2005-1-1 0:0:0
nc_close(ncin)

dimnames(tsl) <- list(lon=lon, lat=lat, yr=(time/365) + 2005)
tsl <- as.data.frame.table(tsl, stringsAsFactors=FALSE, responseName='value')
tsl <- as.data.frame(lapply(tsl, as.numeric))

##Make the latitudes agree, off by 1e-6
tsl$lat <- round(tsl$lat, 2)
maps.ls <- lapply(maps.ls, function(xx){xx$lat <- round(xx$lat, 2); return(xx)})

##Trim tsl to only cover 2015-2049
tsl <- subset(tsl, yr >= 2015 & yr <=2049)
tsl.start <- ddply(subset(tsl, yr >= min(yr) & yr < (min(yr)+10)), .(lon, lat),
                  summarize, value=mean(value))
tsl.end <- ddply(subset(tsl, yr > max(yr)-10 & yr <= max(yr)), .(lon, lat),
                summarize, value=mean(value))
tsl.change <- merge(tsl.start, tsl.end, by=c('lon', 'lat'), suffixes=c('.inital', '.final'))

if(verbose){
  print(ggplot(tsl.change) + geom_raster(aes(x=lon, y=lat, fill=value.final-value.inital)) +
        labs(title='CESM-BCG temperature change'))
  print(ggplot(tsl.change) + geom_histogram(aes(x=value.final-value.inital)) +
        labs(title='CESM-BCG temperature change'))
}
}

if(verbose){
  print(ggplot(maps.ls$soilGrid) + geom_raster(aes(x=lon, y=lat, fill=value/10)) +
        scale_fill_continuous(limits=c(0, 300),low="yellow", high='red') +
        labs( title='Soil Grids'))
  print(ggplot(maps.ls$HWSD) + geom_raster(aes(x=lon, y=lat, fill=value)) +
        scale_fill_continuous(limits=c(0, 100),low="yellow", high='red') + labs(title='HWSD'))

  print(ggplot(maps.ls$landfrac) + geom_raster(aes(x=lon, y=lat, fill=value/100)) +
        scale_fill_continuous(limits=c(0, 1),low="yellow", high='red') +
        labs( title='Land Fraction'))
  print(ggplot(maps.ls$gridArea) + geom_raster(aes(x=lon, y=lat, fill=value)) +
        labs( title='Grid Area'))
  print(ggplot(maps.ls$landArea) + geom_raster(aes(x=lon, y=lat, fill=value)) +
        labs( title='Land Area'))
}

#####
##Make one dataframe to work from so that the lat-lon pair up appropriately
#####
commonGrid <- merge(maps.ls$landArea,

```

```

merge(maps.ls$soilGrid, maps.ls$HWSO,
      by=c('lon', 'lat'), suffixes=c('.SG', '.H')),
by=c('lon', 'lat'))
if(readIn.tsl){
  commonGrid <- merge(tsl.change, commonGrid,
                    by=c('lon', 'lat'), suffixes=c('.Dtsl', '.landArea'))
}

commonGrid <- rename(commonGrid, c('value.inital'='inital.temperature',
                                  'value.final'='final.temperature',
                                  'value.area'='cell.area',
                                  'value.perc'='land.percentage',
                                  'value'='land.area',
                                  'value.SG'='SoilGrid.SOC', 'value.H'='HWSO.SOC'))

##Shift the units for soil grid to kg m-2
commonGrid$SoilGrid.SOC <- commonGrid$SoilGrid.SOC/10

###Remove 0 values
##commonGrid$SoilGrid.SOC[commonGrid$SoilGrid.SOC == 0] <- NA
##commonGrid$HWSO.SOC[commonGrid$HWSO.SOC == 0] <- NA

commonGrid$allFinite <- is.finite(rowSums(subset(commonGrid, select=-HWSO.SOC))) &
  commonGrid$land.area != 0

#####
###Pull temperature normalization from CESM if needed
#####
if(readIn.tsl){
  globalCESM.dT <- with(commonGrid, sum(land.area*
                                       (final.temperature-inital.temperature)*allFinite,
                                       na.rm=TRUE)/sum(land.area*allFinite, na.rm=TRUE))
}else{
  globalCESM.dT <- NA
}

if(verbose){
  ggplot(commonGrid) + geom_raster(aes(x=lon, y=lat, fill=allFinite)) +
    labs(title='Shared grid cells')
  print(sprintf("Global totals: HWSO = %0.2f Pg,
                SoilGrid = %0.2f Pg, inital T = %0.2f C, dT = %0.2f C",
                with(commonGrid, sum(land.area*(HWSO.SOC)*allFinite, na.rm=TRUE)/1e12),
                with(commonGrid, sum(land.area*(SoilGrid.SOC)*allFinite, na.rm=TRUE)/1e12),
                ifelse(readIn.tsl, with(commonGrid,
                                       sum(land.area*inital.temperature*allFinite, na.rm=TRUE)/
                                       sum(land.area*allFinite, na.rm=TRUE))-273.15, NA),
                globalCESM.dT
                ))
}

#####
###Run the global extrapolation
#####
load(sprintf('%sparCIForLM.RData', dataDir))

```

```

soilDepth <- 0.15 #in m; for HWSO it's 0.3
##Number of years we run through
runTime <- 35

dC <- function(args, step, Cstock){
  #correct for soil depth but converting stocks from per area to per volume
  #...and then correcting the result from per volume to per area
  return(step*(args$C*Cstock/soilDepth+args$intercept)*soilDepth)
}

##Use the temperature change distribution from CESM from year 2040-2049 and 2015-2024
if(readIn.tsl){
  degWarmedRate.ls <- list(oneDeg=1/runTime, twoDeg=2/runTime,
                          threeDeg=3/runTime, fourDeg=4/runTime,
                          oneDeg_CESM_normed = (commonGrid$final.temperature-
                                                  commonGrid$inital.temperature)/
                                                  globalCESM.dT*1/runTime,
                          twoDeg_CESM_normed = (commonGrid$final.temperature-
                                                  commonGrid$inital.temperature)/
                                                  globalCESM.dT*2/runTime,
                          threeDeg_CESM_normed = (commonGrid$final.temperature-
                                                  commonGrid$inital.temperature)/
                                                  globalCESM.dT*3/runTime,
                          fourDeg_CESM_normed = (commonGrid$final.temperature-
                                                  commonGrid$inital.temperature)/
                                                  globalCESM.dT*4/runTime)
}else{
  degWarmedRate.ls <-list(oneDeg=1/runTime, twoDeg=2/runTime)
}

#Time step for each linear model type
dtime.ls <- list(wk1=1/52, mon1 = 1/12, mon6 = 6/12, yr1 = 1,
                yr4 = 4, yr5 = 5, yr7 = 7, yr8 = 8,
                yr8.75= 8.75, yr10 = 10, yr11.6=35/3,
                yr17.5=17.5, yr20 = 20, yr25 = 25, yr30 = 30, yr35 = 35)

resultsFull <- ldply(degWarmedRate.ls, .id='warming', function(degWarmedRate){
  ##Calculate the SOC losses
  SOC.losses <- ddply(parRange, c('type', 'qrt', 'intercept', 'C'),
                    function(xx){
                      #cat(xx$type)

                      C.map <- commonGrid$SoilGrid.SOC

                      if(grepl('~dCperDegYr$', xx$type)){
                        dC.map <- ldply(dtime.ls, .id=NULL, function(warmedTime){
                          degStep <- degWarmedRate/2*warmedTime^2
                          return(data.frame(degYr.mean=sum(degStep*commonGrid$land.area, na.rm=TRUE)/
                                              sum(is.finite(degStep)*commonGrid$land.area, na.rm=TRUE),
                                              timeStep=warmedTime,
                                              lon=commonGrid$lon,
                                              lat=commonGrid$lat,
                                              value.C=C.map,

```

```

        landArea=commonGrid$land.area*commonGrid$allFinite,
        value.dC=dC(args=xx, step=degStep, Cstock=C.map)))
    })
} else if(grepl('^dCperDeg$', xx$type)){
  dC.map <- data.frame(degYr.mean=NA,
                      timeStep=NA,
                      lon=commonGrid$lon,
                      lat=commonGrid$lat,
                      value.C=C.map,
                      landArea=commonGrid$land.area*commonGrid$allFinite,
                      value.dC=dC(args=xx, step=degWarmedRate*runTime, Cstock=C.map))
} else{ ##Cap study
  #print(xx$type)
  #print(!(xx$type %in% names(dtime.ls)) || (runTime/dtime.ls[[xx$type]]) %% 1 != 0)
  if(!(xx$type %in% names(dtime.ls)) ||
      (runTime/dtime.ls[[xx$type]]) %% 1 != 0){
    return(data.frame()) #don't run if you can't cover the entire period
  }
  runningC <- C.map
  degStep <- degWarmedRate/2*dtime.ls[[xx$type]]^2 #cumulative degYr for each time step
  for(ii in seq(0, runTime-1, by=dtime.ls[[xx$type]])){
    runningC <- runningC + dC(args=xx, step=degStep, Cstock=runningC)
  }

  dC.map <- data.frame(degYr.mean=mean(degStep, na.rm=TRUE),
                      timeStep=dtime.ls[[xx$type]],
                      lon=commonGrid$lon,
                      lat=commonGrid$lat,
                      value.C=C.map,
                      landArea=commonGrid$land.area*commonGrid$allFinite,
                      value.dC=runningC-C.map)
}

##max loss is the initial carbon stock
dC.map$value.dC[is.finite(dC.map$value.C+dC.map$value.dC) & dC.map$value.dC +
                dC.map$value.C < 0] <-
  -1*dC.map$value.C[is.finite(dC.map$value.C+dC.map$value.dC) & dC.map$value.dC +
                    dC.map$value.C < 0]

#dC.map <- merge(dC.map, commonGrid[,c('lon', 'lat', 'land.area', 'allFinite')])
return(ddply(dC.map, c('timeStep', 'degYr.mean'),
             summarize, dC=sum(value.dC*landArea, na.rm=TRUE)/1e12))
}) #end SOC.losses
}) #end resultsTable

resultsTable <- merge(subset(resultsFull, qrt==0.95,
                             select=c('warming', 'type', 'timeStep', 'degYr.mean', 'dC')),
                    merge(subset(resultsFull, qrt==0.05,
                                  select=c('warming', 'type', 'timeStep', 'degYr.mean', 'dC')),
                          subset(resultsFull, qrt==0.50,
                                  select=c('warming', 'type', 'timeStep', 'degYr.mean', 'dC')),
                          by=c('warming', 'type', 'degYr.mean', 'timeStep'), suffixes=c('_qrt05', '_qrt50')))
resultsTable <- rename(resultsTable, c('dC'='dC_qrt95'))

```



```

resultsTable$dodge.timeStep <- resultsTable$timeStep +
  rnorm(n=length(resultsTable$timeStep), mean=0, sd=0.1)
deg.key <- list("fourDeg"=4, "oneDeg"=1, "threeDeg"=3, "twoDeg"=2)
resultsTable$globalWarming <- as.factor(unlist(lapply(strsplit(
  as.character(resultsTable$warming), split="_"), function(xx){deg.key[[xx[[1]]]})))

resultsTable$warmingDistribution <- unlist(lapply(strsplit(
  as.character(resultsTable$warming), split="_"),
  function(xx){ifelse(length(xx) > 1, 'CESM', 'unif')}))

save(file='../data/globalExtrapolations.RData', resultsTable, resultsFull)

#####
##Make plots
degYrSingle.pl <- ggplot(subset(resultsTable, grepl('dCperDegYr', type))) +
  geom_point(aes(x=timeStep, y=dC_qrt50)) +
  geom_errorbar(aes(x=timeStep, y=dC_qrt50, ymin=dC_qrt05, ymax=dC_qrt95)) +
  facet_wrap(~warming, nrow=2) +
  labs(title='dC per degree-year across single time steps', x='years', y='Pg C')
ggsave(degYrSingle.pl, filename='../figs/degYrSingleTimeStep.pdf')

degYr.pl <- ggplot(subset(resultsTable, grepl('dCperDegYr', type))) +
  geom_point(aes(x=degYr.mean, y=dC_qrt50, color=grepl('CESM', warming))) +
  geom_ribbon(aes(x=degYr.mean, y=dC_qrt50, ymin=dC_qrt05, ymax=dC_qrt95,
    fill=grepl('CESM', warming)), alpha=0.3) +
  scale_fill_discrete(guide=guide_legend(title='CESM'))+guides(color=FALSE) +
  labs(title='dC per degree-year across single time steps', x='degree-years', y='Pg C')
ggsave(degYr.pl, filename='../figs/degYr.pdf')

degSingle.pl <- ggplot(subset(resultsTable, 'dCperDeg'== type)) +
  geom_point(aes(x=warming, y=dC_qrt50)) +
  geom_errorbar(aes(x=warming, y=dC_qrt50, ymin=dC_qrt05, ymax=dC_qrt95)) +
  theme(axis.text.x = element_text(angle = 90, hjust = 1)) + labs(title='dC per degree')
ggsave(degSingle.pl, filename='../figs/degSingleTimeStep.pdf')

degYrStepInt.pl <- ggplot(subset(resultsTable, !grepl('dCperDeg', type))) +
  geom_line(aes(x=timeStep, y=dC_qrt50, group=warming, linetype=warmingDistribution)) +
  geom_ribbon(aes(x=timeStep, y=dC_qrt50, ymin=dC_qrt05, ymax=dC_qrt95, group=warming),
    alpha=0.2) +
  facet_wrap(~globalWarming)
ggsave(degYrStepInt.pl, filename='../figs/degYrMultiTimeStep.pdf')

##See Crowther2016Sup.Rmd for figure code
write.csv(file='../data/degYrMultiTimeStepSimple.csv',
  subset(resultsTable, !grepl('dCperDeg', type) & globalWarming %in% c('1', '2'))

singleStep.pl <- ggplot(subset(resultsTable, grepl('dCperDeg', type) &
  globalWarming %in% c(1,2) &
  (is.na(timeStep) | timeStep == 35))) +
  geom_point(aes(x=globalWarming, y=dC_qrt50, color=type, shape=warmingDistribution), cex=5) +
  geom_errorbar(aes(x=globalWarming, y=dC_qrt50, color=type, linetype=warmingDistribution,
    ymin=dC_qrt05, ymax=dC_qrt95)) +
  labs(title='Soil carbon losses at 35 years, one step', x='Average temperature increase',

```

```

y='Global change in soil carbon [Pg C]')
ggsave(singleStep.pl, filename='../figs/singleStep.pdf')
write.csv(file='../data/singleStep.csv',
          subset(resultsTable, grepl('dCperDeg', type) &
                globalWarming %in% c('1', '2') &
                (is.na(timeStep) | timeStep == 35), -dodge.timeStep))

#####
##Make ncdf file for pretty maps
Cshift <- data.frame(lon=commonGrid$lon, lat=commonGrid$lat,
                    SOC=commonGrid$SoilGrid.SOC,
                    landArea=commonGrid$land.area, ##commonGrid$allFinite,
                    dC.single=dC(args=subset(parRange, type=='dCperDegYr' & qrt==0.5),
                                     step=degWarmedRate.ls$oneDeg_CESM_normed/2*35^2,
                                     Cstock=commonGrid$SoilGrid.SOC))

runningC <- Cshift$SOC
degStep <- degWarmedRate.ls$oneDeg_CESM_normed/2*1^2 #cumulative degYr for each time step
for(ii in seq(0, runTime-1, by=1)){
  runningC <- runningC + dC(args=subset(parRange, type=='yr1' & qrt==0.5),
                            step=degStep, Cstock=runningC)
}
Cshift$dC.multi <- runningC-Cshift$SOC

negFlag <- is.finite(Cshift[, 'dC.single'] + Cshift[, 'SOC']) &
  (Cshift[, 'dC.single'] + Cshift[, 'SOC'] < 0 )
Cshift[negFlag, 'dC.single'] <- -1*Cshift[negFlag, 'SOC']
negFlag <- is.finite(Cshift[, 'dC.multi'] + Cshift[, 'SOC']) &
  (Cshift[, 'dC.multi'] + Cshift[, 'SOC'] < 0 )
Cshift[negFlag, 'dC.multi'] <- -1*Cshift[negFlag, 'SOC']

cat('Single step: ', sum(Cshift$dC.single*Cshift$landArea, na.rm=TRUE)/1e12, '=?=',
    unlist(subset(resultsTable, grepl('dCperDegYr', type) &
          globalWarming %in% c(1, 2) &
          (is.na(timeStep) | timeStep == 35) &
          warming=='oneDeg_CESM_normed', dC_qrt50)),
    '\nOne yr step: ', sum(Cshift$dC.multi*Cshift$landArea, na.rm=TRUE)/1e12, '=?=',
    unlist(subset(resultsTable, !grepl('dCperDeg', type) & globalWarming %in% c(1, 2) &
          type=='yr1' & warming=='oneDeg_CESM_normed', dC_qrt50)), '\n')

write.csv(file='Crowther_dSOC_35yr.csv', Cshift)

```

## Global carbon loss map code

```
cat(readLines('../ncl/plot_warming_loss.ncl'), sep='\n')
```

```

; July 2016
; Will Wieder
; plots changes in SOC stocks from Kathe's analyses.
; *****

```

```
load "$NCARG_LIB/ncarg/nclscripts/csm/gsn_code.ncl"
```

```

load "$NCARG_LIB/ncarg/nclscripts/csm/gsn_csm.ncl"
load "$NCARG_LIB/ncarg/nclscripts/csm/contributed.ncl"
load "$NCARG_LIB/ncarg/nclscripts/csm/shear_util.ncl"

begin
;-----
;Read in input variables
;-----
path      = ("/project/tss/wwieder/soilCN/global_run/warming/")
fin       = path + "Crowther_dSOC_35y.nc"

data      = addfile(fin, "r")
SGRD_SOC  = data->SOC_i(:,:)           ; SoilGrids SOC pools, kgC/m2, 0-15 cm
area      = data->Area
dC_single = data->dC_Single
dC_multi  = data->dC_Multi

glob_SOCi = sum(SGRD_SOC * area) / 1.e12
glob_dC_s = sum(dC_single * area) / 1.e12
glob_dC_m = sum(dC_multi * area) / 1.e12

print(glob_SOCi)
print(glob_dC_s)
print(glob_dC_m)

end

;*****
; plot SOC losses
; Fig. 3 in manuscript
;*****
fout = path + "Crowther_dSOC_35y_step_wZERO"
wks  = gsn_open_wks("ps" , fout); open a X11 or ps file

res          = True
res@gsnDraw  = False
res@gsnFrame = False
res@cnSmoothingOn = False
res@mpProjection = "Robinson"
res@mpOutlineOn = True
res@lbOrientation = "Horizontal"
res@mpPerimOn = False
res@mpGridAndLimbOn = True
res@mpGridLatSpacingF = 180
res@mpGridLonSpacingF = 180
res@mpGridLineThicknessF = 0.
res@mpGridLineColor = "transparent"
res@mpGridMaskMode = "MaskLand"

gsn_define_colormap(wks, "BlWhRe")
res@gsnSpreadColors = True           ; use full colormap
res@gsnSpreadColorEnd = 68          ; start with last color
; res@gsnSpreadColorStart = 2       ; start with last color
gsn_reverse_colormap(wks)           ; reverse colormap

```

```
res@gsnLeftString      = ""
res@gsnRightString     = ""
res@cnFillOn           = True
res@cnLinesOn          = False           ; Turn lines off
res@cnLineLabelsOn     = False           ; Turn labels off
res@cnLevelSelectionMode = "ManualLevels"
res@cnMinLevelValF     = -17 ; -3.75*5
res@cnMaxLevelValF     = 5. ; 0.50*5
res@cnLevelSpacingF    = 2. ; 0.5*5
res@lbLabelStrings     = (/ -17., -15., -13., -11., -9., -7., -5., -3., -1., 1., 3., 5./)
; res@lbLabelStrings   = (/ -17., -13., -9., -5., -1., 1., 5./)
res@lbLabelFontHeightF = 0.025           ; make labels larger
res@lbTitleOn          = True             ; turn on title
res@lbTitlePosition    = "Bottom"
res@lbTitleString      = "kg C m~S~-2~N "
res@lbTitleFontHeightF = .030            ; make title smaller
res@pmLabelBarOrthogonalPosF = .05       ; move whole thing down

res@vpXF               = 0.1             ; make plot bigger
res@vpYF               = 0.9
res@vpWidthF           = 0.8
res@vpHeightF          = 0.8
plot                   = gsn_csm_contour_map(wks,dC_single,res)
resP                   = True            ; modify the panel plot
resP@gsnFrame          = False           ; don't advance panel plot
gsn_panel(wks,plot,(/1,1/),resP)        ; now draw as one plot
frame(wks)

print("wrote "+fout+".ps")
delete([/plot, res, resP, wks,fout/])
```
